# Supplementary material for: Return to Sports: A Risky Business? A Systematic Review with Meta-Analysis of Risk Factors for Graft Rupture Following ACL Reconstruction
Source: PubMed Central journal article supplement (PMC9807539; doi:10.1007/s40279-022-01747-3), 2022-08-24
Supplement: 40279_2022_1747_MOESM1_ESM.pdf [file 40279_2022_1747_MOESM1_ESM.pdf]

### Online resource 1. Search strategy

(anterior cruciate ligament[MeSH Terms] OR anterior cruciate ligament reconstruction[MeSH Terms] OR anterior cruciate ligament injury[MeSH Terms] OR "lower extremity"[Title/Abstract] OR "ACL injur\*" [Title/Abstract] OR "anterior cruciate ligament injur\*" [Title/Abstract] OR construct\* [Title/Abstract]) AND ("risk factor\*" [Title/Abstract] OR "injury risk" [Title/Abstract] OR "associated with" [Title/Abstract] OR predict\* [Title/Abstract] OR relat\* AND ("graft injur\*" [Title/Abstract] OR "second\* injur\*" [Title/Abstract] OR reinjur\* [Title/Abstract] OR re-injur\* [Title/Abstract] OR rupture\* [Title/Abstract] OR "graft failure\*" [Title/Abstract]) OR "contralateral injur\*" [Title/Abstract] OR "contra-lateral injur\*" [Title/Abstract]).

In CINAHL and EMBASE the search was performed without MeSH-terms. The search was not restricted to any publication date
