# Supplementary material for: Return to Sports: A Risky Business? A Systematic Review with Meta-Analysis of Risk Factors for Graft Rupture Following ACL Reconstruction
Source: PubMed Central journal article supplement (PMC9807539; doi:10.1007/s40279-022-01747-3), 2022-08-24
Supplement: 40279_2022_1747_MOESM3_ESM.pdf [file 40279_2022_1747_MOESM3_ESM.pdf]

Return to sports - a risky business? A systematic review with meta-analysis of risk factors for graft rupture following ACL reconstruction, Sports Medicine, Anna Cronström; anna.cronstrom@umu.se, Eva Tengman, Charlotte Häger, Umeå University

**Online resource 3.** Characteristics and results of the articles and factors excluded from the meta-analysis

| Article, year & country                        | Study design  | Participants (n)       | Graft type                                                    | Number of graft ruptures (n, (%)) | Time to graft rupture (months) | Age Mean (sd/range)           | Activity level /sports participation | Risk factor(s)                                                         | Follow-up (mean/range, years) | Reason for exclusion                                                          | Results                                                                                                                                                                                                                     | RoB  |
|------------------------------------------------|---------------|------------------------|---------------------------------------------------------------|-----------------------------------|--------------------------------|-------------------------------|--------------------------------------|------------------------------------------------------------------------|-------------------------------|-------------------------------------------------------------------------------|-----------------------------------------------------------------------------------------------------------------------------------------------------------------------------------------------------------------------------|------|
| <i>Articles not eligible for meta-analysis</i> |               |                        |                                                               |                                   |                                |                               |                                      |                                                                        |                               |                                                                               |                                                                                                                                                                                                                             |      |
| DeFrancesco et al. 2020 [1] USA                | Retrospective | 476 females, 520 males | Hamstring autograft, allograft, patella autograft             | 130 (13)                          | NR                             | 15.1 (2.2)                    | NR                                   | Age                                                                    | 2.7                           | Only study reporting on specific risk factor with specific cut-off (age >16<) | No difference in graft rupture rate between those age<16 compared to >16 years (p=0.855)                                                                                                                                    | High |
| Della Villa et al. 2021 [2] Sweden             | Prospective   | 118 males              | Patella, hamstring, Quadriceps, iliotibial, other             | 11 (9)                            | 23.5                           | 25 (4.3)                      | All professional soccer players      | Age, contact/non contact mechanism, associated injuries, timing of RTS | 4.3                           | Statistics not possible to re-calculate to OR                                 | Those with an isolated primary ACL injury had higher risk of graft rupture (HR = 3.88, 95% CI; 1.02 – 14.7). No association between age (p = 0.608), contact/non contact mechanism (p = 0.112) or timing of RTS (p = 0.199) | Low  |
| Gagliardi et al. 2019 [3] USA                  | Retrospective | 87 males, 92 females   | Suture ligament augmentation (SLA), quadriceps autograft (QA) | 15 (8)                            | NR                             | SLA 13.9 (3.2), QA 15.7 (1.8) | NR                                   | Age, sex, BMI, timing of surgery                                       | SLA 3.2, QA 2.7               | Statistics not possible to re-calculate to OR                                 | Age at surgery (p = 0.160), BMI (p = 0.883), sex (p = 0.280) and time from injury to surgery (p = 0.4598) were not associated with the Hazard of graft rupture                                                              | Low  |
| Gans et al. 2018 [4] USA                       | Retrospective | NR                     | NR                                                            | 126 (NR)                          | NR                             | NR                            | National collegiate athletic         | Sex                                                                    | 9                             | Statistics not possible to                                                    | Men (rate ratio = 4.3) had a higher rate of                                                                                                                                                                                 | High |

Return to sports - a risky business? A systematic review with meta-analysis of risk factors for graft rupture following ACL reconstruction, Sports Medicine, Anna Cronström; anna.cronstrom@umu.se, Eva Tengman, Charlotte Häger, Umeå University

|                                 |               |                        |                                                                 |         |             |                                                                                                                               |                                               |                                               |       |                                               |                                                                                                                                                                                                                                        |      |
|---------------------------------|---------------|------------------------|-----------------------------------------------------------------|---------|-------------|-------------------------------------------------------------------------------------------------------------------------------|-----------------------------------------------|-----------------------------------------------|-------|-----------------------------------------------|----------------------------------------------------------------------------------------------------------------------------------------------------------------------------------------------------------------------------------------|------|
|                                 |               |                        |                                                                 |         |             |                                                                                                                               | association sport                             |                                               |       | re-calculate to OR                            | graft ruptures than women (Rate ratio = 3.0), p=0.04                                                                                                                                                                                   |      |
| Goncalves et.al 2017 [5] France | Retrospective | 48 males, 27 females   | Patella                                                         | 4 (5)   | NR          | Bi-meniscal repair, 30.8, uni-meniscal repair 32.6, control 31.9                                                              | NR                                            | Bi-meniscal repair                            | 3.6   | Only study reporting on specific risk factor  | The re-rupture rate was higher in the bi-meniscal repair group (3/15) compared to the other 2 groups (1/60), p=0.02.                                                                                                                   | Low  |
| Kinsella et.al 2020 [6] USA     | Retrospective | 16 females, 34 males   | Iliotibial band, hamstring, patella. Tibialis anterior          | 7 (14)  | 12.7        | 13.3 (1.9)                                                                                                                    | NR                                            | Posterolateral corner (PLC) injuries combined | NR    | Only study reporting on specific risk factor  | No association between PLC injury and graft rupture (p=0.19)                                                                                                                                                                           | High |
| Lai et.al 2018 [7] Australia    | Prospective   | 158 (females/males NR) | Hamstring autograft, patella, allograft, other autografts, LARS | 37 (23) | 15.2 (13.4) | 23.5 (3.6)                                                                                                                    | AFL players                                   | Age, Family history, timing of RTS            | 2-18  | Statistics not possible to re-calculate to OR | Age<21 (RR = 2.5, 95% CI: 1.3-4.8) was associated with a higher risk of graft rupture. A family history of ACL injury (RR = 1.5, 95% CI: 0.7-3.0) and RTS<12 months (RR = 2.3, 95% CI: 0.6-9.1) were not associated with graft rupture | High |
| Levins et al. 2016 [8] USA      | Prospective   | 25 males, 30 females   | Hamstring autograft, patella autograft                          | 11 (20) | NR          | Males: with (18 (2.3)) and without (18.5 (2.5)) graft rupture, Female: with (15.9 (0.8) and without (16.6 (1.2) graft rupture | Participation High school/college level sport | Joint geometry                                | 2-5.5 | Statistics not possible to re-calculate to OR | Increased posterior-inferior-directed slope of the articular cartilage in the lateral tibial plateau measured at 2 locations (hazard ratio [HR] = 1.50, p = .029; HR = 1.39,                                                           | High |



Return to sports - a risky business? A systematic review with meta-analysis of risk factors for graft rupture following ACL reconstruction, Sports Medicine, Anna Cronström; anna.cronstrom@umu.se, Eva Tengman, Charlotte Häger, Umeå University

|                               |               |                          |                                                                                                                                     |         |    |             |                                                                |                            |               |                                              |                                                                                                                                                                       |      |
|-------------------------------|---------------|--------------------------|-------------------------------------------------------------------------------------------------------------------------------------|---------|----|-------------|----------------------------------------------------------------|----------------------------|---------------|----------------------------------------------|-----------------------------------------------------------------------------------------------------------------------------------------------------------------------|------|
|                               |               |                          |                                                                                                                                     |         |    |             |                                                                |                            |               |                                              | 0.72, p = .020) were associated with graft rupture. No associations between 20 other unique geometric measurements and graft ruptures                                 |      |
| Magnussen et al. 2018 [9] USA | Prospective   | 1023 females, 1302 males | Bone tendon bone autograft, hamstring autograft, quadriceps autograft, allograft                                                    | 147 (6) | NR | 26.7 (11.1) | Recreational/competitiv sports participation at primary injury | Pre-operative knee laxity  | 6             | Only study defining laxity as >10<degrees    | High grade pre-operative knee laxity was associated with higher odds of revision surgery (OR = 1.73, p = 0.04)                                                        | Low  |
| Patel et al. 2019 [10] USA    | Retrospective | 521 females, 535 males   | Hamstring autograft, tibialis posterior allograft, hybrid autograft, allograft, patella autograft, iliotibial band autograft, other | 76 (7)  | NR | 15.1 (2.4)  | 92% participated in sports at primary injury                   | BMI                        | 2.2           | Only study defining BMI as percentiles       | No difference in the rate of graft rupture between those with normal BMI (10.8%) and those with overweight (10.0%), p = 0.74                                          | Low  |
| Paterno et al. 2018 [11] USA  | Prospective   | 40 (females/males NR)    | NR                                                                                                                                  | 8 (20)  | NR | 16.2 (3.4)  | IKDC level 1-2 at primary injury                               | Fear of movement/re-injury | 1 (after RTS) | Only study reporting on specific risk factor | Those who sustained a graft rupture had worse score of the Tampa Scale for Kinesiophobia at return to sport (19.8 (4.0) than those who did not (16.4 (3.6)), p = 0.03 | High |

Return to sports - a risky business? A systematic review with meta-analysis of risk factors for graft rupture following ACL reconstruction, Sports Medicine, Anna Cronström; anna.cronstrom@umu.se, Eva Tengman, Charlotte Häger, Umeå University

|                                                                                                                                       |               |                        |                                                   |         |            |                                                                   |                                                    |                                                            |                  |                                                                                        |                                                                                                                                                                                                                           |          |
|---------------------------------------------------------------------------------------------------------------------------------------|---------------|------------------------|---------------------------------------------------|---------|------------|-------------------------------------------------------------------|----------------------------------------------------|------------------------------------------------------------|------------------|----------------------------------------------------------------------------------------|---------------------------------------------------------------------------------------------------------------------------------------------------------------------------------------------------------------------------|----------|
| Sonnery-Cottet et al. 2017 [12]<br>France                                                                                             | Prospective   | 138 females, 364 males | Bone patella bone autograft, hamstring autograft, | 40 (8)  | 18.5 (9.5) | 22.4 (4.0)                                                        | Participating in pivoting sports at primary injury | Age, sex, type of sport, pre-operative knee laxity >7< mm, | 3.2              | Statistics not possible to re-calculate to OR                                          | Those <25 years had increased risk of graft rupture compared to those >25 years (HR = 3.43, p = 0.12). No association between sex, contact vs non contact sport or pre-operative knee laxity and graft rupture (p > 0.05) | Low      |
| <i>Additional risk factors not eligible for meta-analysis from articles included in the meta-analysis for any other risk factor/s</i> |               |                        |                                                   |         |            |                                                                   |                                                    |                                                            |                  |                                                                                        |                                                                                                                                                                                                                           |          |
| Benner et al. 2016 [13]<br>USA                                                                                                        | Prospective   | 553 (females/males NR) | Patella autograft                                 | 42 (8)  | NR         | With graft rupture: 18.6 (5.1), without graft rupture: 23.7 (9.4) | Activity score: 8.4                                | Pre- and post-operative knee hyper extension               | 4.1              | Only study reporting on specific risk factor with specific cut-offs (>6 or <3 degrees) | No difference in graft rupture rate between groups: >6 degrees (6.9%), <3 degrees (9.8), p=0.246)                                                                                                                         | Moderate |
| Cooper et al. 2018 [14]<br>USA                                                                                                        | Prospective   | 484 females, 661 males | Patella autograft, allograft                      | 34 (3)  | NR         | 26                                                                | NR                                                 | Pre-operative knee hyper extension                         | 2                | Only study reporting on specific risk factor with specific cut-offs (>5< degrees)      | Those with hyper extension >5 degrees had higher risk of graft rupture (OR=2.2, p=0.030)                                                                                                                                  | High     |
| Cruz et al. 2017 [15]<br>USA                                                                                                          | Retrospective | 24 girls, 79 boys      | Allograft, autograft, hybrid                      | 11 (11) | 23         | 12.1 (6.3-15.7)                                                   | NR                                                 | Knee flexion at 6 weeks post op                            | 1.8              | Only study reporting on specific risk factor                                           | No difference in knee flexion between those who sustained a graft rupture and those who did not (p=0.056)                                                                                                                 | Low      |
| Csapo et al. 2021 [16]<br>Austria                                                                                                     | Retrospective | 17 females, 13 males   | Hamstring, quadriceps                             | 5 (17)  | 29.4       | 21.6 (4.0)                                                        | Professional ski racers at primary injury          | Simple/complex injury, timing of RTS                       | At least 2 years | Only study reporting on specific risk factor with specific cut                         | No association between simple/complex injury (OR = 0.5, 95% CI; 0.1 – 5.1), or timing                                                                                                                                     | High     |

Return to sports - a risky business? A systematic review with meta-analysis of risk factors for graft rupture following ACL reconstruction, Sports Medicine, Anna Cronström; anna.cronstrom@umu.se, Eva Tengman, Charlotte Häger, Umeå University

|                                   |               |                             |                                |         |      |                                                           |                                                                               |                                                                                                                                                                                                                                         |           | off (RTS<br>≥300 vs. <<br>300 days            | of RTS (OR =<br>1.2, 95% CI; 0.2<br>– 8.5)                                                                                                                                                                                                                                                                                                                                          |          |
|-----------------------------------|---------------|-----------------------------|--------------------------------|---------|------|-----------------------------------------------------------|-------------------------------------------------------------------------------|-----------------------------------------------------------------------------------------------------------------------------------------------------------------------------------------------------------------------------------------|-----------|-----------------------------------------------|-------------------------------------------------------------------------------------------------------------------------------------------------------------------------------------------------------------------------------------------------------------------------------------------------------------------------------------------------------------------------------------|----------|
| Engelman et al. 2014 [17] USA     | Retrospective | 33 girls, 40 boys,          | Hamstring autograft, allograft | 15 (21) | NR   | 15 (11.2-18.7)                                            | NR                                                                            | Age, history of knee surgery, timing of surgery, associated injuries, timing of physical therapy initiation (>2< weeks) post-operative knee laxity (compared to contra-lateral leg) growth plate status, post-operative range of motion | 2.7 - 4.2 | Statistics not possible to re-calculate to OR | Increased post-operative knee laxity was associated with higher risk of graft failure (HR=5.28, p=0.022). No association between age (p=0.993), history of knee surgery (p=0.583), timing of surgery (p=0.171), additional meniscal surgeries (p=0.228, timing of physical therapy initiation (p=0.103), growth plate status (p=0.142) or post-operative range of motion (p=0.996). | High     |
| Digiacoimo et al. 2018 [18] USA   | Prospective   | 12 females, 16 males        | NR                             | 14 (50) | 16.4 | Graft rupture: 17.9 (4.0)<br>No graft rupture: 18.7 (4.0) | Tegner score at primary injury<br>Graft rupture: 8.6<br>No graft rupture: 8.0 | Femoral notch shape index (NSI)                                                                                                                                                                                                         | 4         | Only study reporting on specific risk factor  | No differences in NSI between those who sustained a graft rupture and those who did not (p>0.05)                                                                                                                                                                                                                                                                                    | Moderate |
| Fältström et al. 2016 [19] Sweden | Retrospective | 8 986 females, 11 838 males | Hamstring autograft            | 702 (3) | NR   | Graft rupture: 21.9 (7.3)<br>No graft rupture: 27 (9.9)   | Soccer, other contact ball sports, other sport/recreation, other              | Pre-operative EQ5D                                                                                                                                                                                                                      | 0.5-8.6   | Only study reporting on specific risk factor  | Those who sustained a graft rupture had lower pre-operative EQ5D                                                                                                                                                                                                                                                                                                                    | Low      |

Return to sports - a risky business? A systematic review with meta-analysis of risk factors for graft rupture following ACL reconstruction, Sports Medicine, Anna Cronström; anna.cronstrom@umu.se, Eva Tengman, Charlotte Häger, Umeå University

|                                  |               |                      |                     |         |      |                                                                          |                    |                                                                                                                                                                                                                                                               |     |                                                                                                                                    |                                                                                                                                                                                                              |      |
|----------------------------------|---------------|----------------------|---------------------|---------|------|--------------------------------------------------------------------------|--------------------|---------------------------------------------------------------------------------------------------------------------------------------------------------------------------------------------------------------------------------------------------------------|-----|------------------------------------------------------------------------------------------------------------------------------------|--------------------------------------------------------------------------------------------------------------------------------------------------------------------------------------------------------------|------|
|                                  |               |                      |                     |         |      |                                                                          | (causes of injury) |                                                                                                                                                                                                                                                               |     |                                                                                                                                    | index (0.66 vs 0.68, p=0.003) and lower EQ5D VAS score (60.7 vs 63.3, p=0.005) than those who did not                                                                                                        |      |
| Ghosh et al. 2020 [20] Australia | Prospective   | 32 girls, 68 boys    | Hamstring allograft | 12 (12) | 11   | 14 (8-16)                                                                | NR                 | Tibial slope, tanner stage                                                                                                                                                                                                                                    | 2   | Statistics not possible to re-calculate to OR (tibial slope) or only study reporting on specific cut-off (tanner stage 1-3 vs 4-5) | Those with tanner stage 4-5 had higher risk of sustaining a graft rupture (p=0.05). No difference in tibial slope (>12< degrees) between those who sustained a graft rupture and those who did not (p>0.05). | High |
| Grassi et al. 2019 [21] Italy    | Retrospective | 18 females, 68 males | Hamstring autograft | 43 (50) | NR   | Graft rupture: 21.8 (q1-q3: 18.7-26.7) Controls: 23.3 (q1-q3: 19.6-23.2) | NR                 | Transepicondylar distance (TE), medial femoral condyle ratio (MFC), lateral/medial tibial plateau subluxation (LTP/MTP), notch width index (NWI), notch ratio (NR), lateral/medial femoral condyle width (LFCw/MFCw, lateral/medial plateau width (LTPw/MTPw) | 3   | Only study with sufficient statistics including specific variables                                                                 | Those with graft rupture had greater LTP, MTP and MFCw compared to those with intact graft (p≤0.001). No differences in the other variables between those with graft rupture and intact graft (p>0.05)       | Low  |
| Heath et al. 2019 [22]           | Retrospective | 82 girls, 166 boys   | Hamstring allograft | 51 (21) | 17.5 | 14.6 (8-17.9)                                                            | > 86% participated | Tanner stage                                                                                                                                                                                                                                                  | 4.5 | Only study reporting                                                                                                               | Those with Tanner stage 3-                                                                                                                                                                                   | Low  |

Return to sports - a risky business? A systematic review with meta-analysis of risk factors for graft rupture following ACL reconstruction, Sports Medicine, Anna Cronström; anna.cronstrom@umu.se, Eva Tengman, Charlotte Häger, Umeå University

|                                    |               |                        |           |         |    |                                                |                                                                        |                                                                                                             |     |                                                                                                                                                           |                                                                                                                                                                                                                                                                                                           |      |
|------------------------------------|---------------|------------------------|-----------|---------|----|------------------------------------------------|------------------------------------------------------------------------|-------------------------------------------------------------------------------------------------------------|-----|-----------------------------------------------------------------------------------------------------------------------------------------------------------|-----------------------------------------------------------------------------------------------------------------------------------------------------------------------------------------------------------------------------------------------------------------------------------------------------------|------|
| Australia                          |               |                        |           |         |    |                                                | in sports at primary injury                                            |                                                                                                             |     | on specific factor with specific cut-off (Tanner stage 1-2 vs 3-5)                                                                                        | 5 had higher risk of sustaining a graft rupture compared to Tanner stage 1-2 (HR=3.7, p=0.01)                                                                                                                                                                                                             |      |
| Henle et al. 2018 [23] Switzerland | Prospective   | 186 females, 195 males | LARS      | 30 (8)  | NR | 33 (12)                                        | 55% Tegner score of 5 or 6, time point NR                              | Post-operative knee laxity (side-to-side difference)                                                        | 2.5 | Only study reporting on specific risk factor including sufficient statistics                                                                              | Increased knee laxity was associated to graft rupture (OR=1.34, p=0.015)                                                                                                                                                                                                                                  | Low  |
| Kamien et al. 2013 [24] USA        | Retrospective | 98 (females, males NR) | Hamstring | 15 (15) | NR | Range. 12-52                                   | Tegner score (time point NR): Graft rupture: 5.5 No graft rupture: 4.8 | Tegner level                                                                                                | 2   | Unclear time point for assessing activity level                                                                                                           | No differences in Tegner activity level between those who sustained a graft rupture (5.53) and those who did not (4.81), p=0.463.                                                                                                                                                                         | High |
| Kim et al. 2020 [25] South Korea   | Retrospective | 19 females, 101 males  | NR        | 31 (26) | NR | Graft rupture: 29.3 (8.3) Controls: 31.1 (7.9) | Pre-operative Tegner score: 3                                          | Post-operative Tegner level, associated injuries, pre- and post-operative knee laxity, knee range of motion | 4.1 | Only study reporting on specific risk factors at specific time point and with specific cut-offs (lachman/pivot test >grade 2<) with sufficient statistics | Those sustained a graft rupture had a higher post-operative tegner level, more often an associated ALL injury and pre- and post-operative knee laxity $\geq$ grade 2 compared to those who did not (p<0.05). No difference in pre-operative Tegner level or post-operative knee range of motion (p>0.05). | Low  |



Return to sports - a risky business? A systematic review with meta-analysis of risk factors for graft rupture following ACL reconstruction, Sports Medicine, Anna Cronström; anna.cronstrom@umu.se, Eva Tengman, Charlotte Häger, Umeå University

|                                       |               |                        |                    |         |      |             |                                                           |                                                                              |   |                                                                      |                                                                                                                                                                                                                                                                                                                                                                                                                                                                                                                                           |          |
|---------------------------------------|---------------|------------------------|--------------------|---------|------|-------------|-----------------------------------------------------------|------------------------------------------------------------------------------|---|----------------------------------------------------------------------|-------------------------------------------------------------------------------------------------------------------------------------------------------------------------------------------------------------------------------------------------------------------------------------------------------------------------------------------------------------------------------------------------------------------------------------------------------------------------------------------------------------------------------------------|----------|
| King et al. 2021 [26] Ireland         | Prospective   | 88 males               | Patella, hamstring | 31 (35) | 19.8 | 18 - 35     | All played multidirectional field sport at primary injury | Marx activity scale (at 9 months post injury), hop performance, biomechanics | 2 | Only study reporting on specific risk factors at specific time       | Those who sustained a graft rupture had greater knee flexion angle ( $p=0.030$ ), lower center of mass to ankle distance ( $p=0.027$ ) during double-leg drop jump, greater ground contact time during a planned change of direction movement ( $p\leq 0.037$ ) and lower degrees of pelvic tilt during an unplanned change of direction movement than those who did not sustain a graft rupture. No differences for Marx activity score or hop performance during single-leg counter movement jump and single-leg drop jump ( $p>0.05$ ) | High     |
| Krismser et al. 2017 [27] Switzerland | Retrospective | 109 females, 155 males | LARS               | 25 (9)  | 7.1  | 30.8 (12.2) | Tegner score at primary injury: 7                         | Pre-operative knee laxity, extension and flexion deficits                    | 2 | Only study reporting on specific risk factors at specific time point | No differences in pre-operative knee laxity, extension or flexion deficits between those who sustained a graft rupture                                                                                                                                                                                                                                                                                                                                                                                                                    | Moderate |

Return to sports - a risky business? A systematic review with meta-analysis of risk factors for graft rupture following ACL reconstruction, Sports Medicine, Anna Cronström; anna.cronstrom@umu.se, Eva Tengman, Charlotte Häger, Umeå University

|                                 |             |           |                                 |         |                 |                                                   |                       |                                                                                                                                         |                 |                                               |                                                                                                                                                                                                                                                                                                                                                                                                                                                                                                                                                                                                                                                                  |     |
|---------------------------------|-------------|-----------|---------------------------------|---------|-----------------|---------------------------------------------------|-----------------------|-----------------------------------------------------------------------------------------------------------------------------------------|-----------------|-----------------------------------------------|------------------------------------------------------------------------------------------------------------------------------------------------------------------------------------------------------------------------------------------------------------------------------------------------------------------------------------------------------------------------------------------------------------------------------------------------------------------------------------------------------------------------------------------------------------------------------------------------------------------------------------------------------------------|-----|
|                                 |             |           |                                 |         |                 |                                                   |                       |                                                                                                                                         |                 |                                               | and those who did not (p>0.05)                                                                                                                                                                                                                                                                                                                                                                                                                                                                                                                                                                                                                                   |     |
| Kyritsis et al. 2016 [28] Qatar | Prospective | 158 males | Patella tendon, hamstring graft | 26 (16) | 3.5 (after RTS) | Graft rupture: 22 (5)<br>No graft rupture: 21 (4) | Professional athletes | Rehabilitation duration, associated injuries combined, hamstring and quadriceps peak muscle strength and hop performance at time of RTS | 2.5 (after RTS) | Only study reporting on specific risk factors | Those who sustained a graft rupture had lower hamstring peak torque at 300 °/s (118 vs 128, p=0.004) on the involved leg, lower hamstring to quadriceps ratio at 60°/s on the involved leg (53 vs 58, p=0.004), lower hamstring average power on the involved leg at 60°/s (79 vs 91, p=0.006), 180 °/s (154 vs 173, p=0.003) and 300 °/s (148 vs 171, p=0.02) No other differences at different speeds for quadriceps or hamstring peak torque, average power or work fatigues were observed for the involved or uninvolved legs. No difference in rehabilitation duration (221 vs 247 days, p=0.070), associated injuries (27% vs 45%, p=0.080) or LSI for the | Low |

Return to sports - a risky business? A systematic review with meta-analysis of risk factors for graft rupture following ACL reconstruction, Sports Medicine, Anna Cronström; anna.cronstrom@umu.se, Eva Tengman, Charlotte Häger, Umeå University

|                                 |               |                        |                                                              |         |      |                 |                                             |                           |     |                                                                                               |                                                                                                                                                                                                                                                 |     |
|---------------------------------|---------------|------------------------|--------------------------------------------------------------|---------|------|-----------------|---------------------------------------------|---------------------------|-----|-----------------------------------------------------------------------------------------------|-------------------------------------------------------------------------------------------------------------------------------------------------------------------------------------------------------------------------------------------------|-----|
|                                 |               |                        |                                                              |         |      |                 |                                             |                           |     |                                                                                               | cross over hop for distance (99 vs 99) between those who sustained a graft rupture and those who did not.                                                                                                                                       |     |
| Mitchell et al. 2021 [29] USA   | Retrospective | 83 females, 70 males   | Patella, quadriceps, hamstring                               | 39 (25) | NR   | 14.2 (9.3 – 19) | NR                                          |                           | 3.5 | Tibial translation, tibial rotation, coronal lateral collateral ligament (LCL) sign on MRI    | Greater tibial rotation (p=0.042) and LCL sign (p=0.013) on MRI were associated with graft rupture. No association for tibial translation                                                                                                       | Low |
| Mohtadi et al. 2016 [30] Canada | Prospective   | 147 females, 183 males | Patella, hamstring                                           | 17 (5)  | 18.3 | 28.5 (9.8)      | Tegner Score ≥ 5 at primary injury          | Pre-injury activity level | 2   | Only study reporting on specific risk factor with specific cut-offs (high/low activity level) | No association between activity level and graft rupture (OR=1.21, 95%C; 0.81-1.81)                                                                                                                                                              | Low |
| Poston et al. 2020 [31] USA     | Prospective   | 32 females, 17 males   | Hamstring autograft, allograft patella autograft, allografts | 7 (14)  | <24  | 16.5 (3.0)      | Pivoting or cutting sport at primary injury | Kinematics                | 2   | Only study reporting on specific risk factors                                                 | The sum of knee valgus and trunk lean and the sum of knee valgus, trunk lean and pelvis deviation, respectively, were associated with a higher risk of graft rupture (p≤0.02). No associations between individual assessments of trunk lean and | Low |

Return to sports - a risky business? A systematic review with meta-analysis of risk factors for graft rupture following ACL reconstruction, Sports Medicine, Anna Cronström; anna.cronstrom@umu.se, Eva Tengman, Charlotte Häger, Umeå University

|                                          |               |                              |                                        |         |                                                    |              |                                                             |                                                                                   |      |                                                                                                |                                                                                                                                                                                                                                 |      |
|------------------------------------------|---------------|------------------------------|----------------------------------------|---------|----------------------------------------------------|--------------|-------------------------------------------------------------|-----------------------------------------------------------------------------------|------|------------------------------------------------------------------------------------------------|---------------------------------------------------------------------------------------------------------------------------------------------------------------------------------------------------------------------------------|------|
|                                          |               |                              |                                        |         |                                                    |              |                                                             |                                                                                   |      |                                                                                                | pelvis deviation and graft rupture ( $p \geq 0.12$ )                                                                                                                                                                            |      |
| Pinczewski et al. 2007 [32]<br>Australia | Prospective   | 85 females<br>95 males       | Patella autograft, hamstring autograft | 19 (11) | Patella autografts: 63<br>Hamstring autografts: 50 | 25 (13-42)   | Pivoting, cutting or side-stepping sports at primary injury | Activity level and knee laxity at 2 years                                         | 10   | Only study reporting on specific risk factors with specific cut-offs (At 2 years post surgery) | Knee laxity at 2 years was associated with graft rupture ( $p=0.001$ ). No association between activity level at 2 years and graft rupture ( $p=0.25$ )                                                                         | High |
| Pullen et al. 2016 [33]<br>USA           | Retrospective | 2728 females,<br>13601 males | NR                                     | 587 (4) | 16.6                                               | 28.9 (7.6)   | 94% active duty military                                    | Medication history                                                                | 7    | Only study reporting on specific risk factor                                                   | A history of NSAIDs ( $p < 0.001$ ) and COX-2 inhibitors ( $p=0.021$ ) were associated with a higher risk of graft rupture                                                                                                      | Low  |
| Rosenstiel et al. 2019 [34]<br>France    | Retrospective | 22 females,<br>48 males      | Hamstring autograft                    | 4 (6)   | 23.9                                               | 23.2 (15-37) | Tegner score: 9.3 (1) at primary injury                     | Age, contact vs non-contact sport, pre-operative knee laxity, associated injuries | 3.9  | Statistics not possible to re-calculate to OR                                                  | Age (HR=1.47, $p=0.739$ ), contact vs non-contact sport (HR=1.67, $p=0.758$ ), knee laxity (HR $\leq$ 1.20, $p=0.310$ ) or lateral/medial meniscal lesions (HR $\leq$ 1.84, $p=0.705$ ) were not associated with graft rupture. | Low  |
| Salmon et al. 2006 [35]<br>Australia     | Prospective   | 20 females,<br>47 males      | Patella autograft                      | 9 (13)  | 77.3                                               | 27 (NR)      | Pivoting, cutting or side-stepping sports at primary injury | Age                                                                               | 5    | Only study with sufficient stats including specific cut-off ( $>21 <$ )                        | Age $< 21$ years was associated with a higher risk of graft rupture (OR=10.0, $p=0.020$ )                                                                                                                                       | Low  |
| Salmon et al. 2018 [36]                  | Prospective   | 74 females,<br>105 males     | Hamstring autograft                    | 37 (21) | NR                                                 | 25.8         | Strenuous, moderate or                                      | Joint geometry                                                                    | 19.7 | Only study including                                                                           | A tibial slope $>12$ degrees                                                                                                                                                                                                    | Low  |

Return to sports - a risky business? A systematic review with meta-analysis of risk factors for graft rupture following ACL reconstruction, Sports Medicine, Anna Cronström; anna.cronstrom@umu.se, Eva Tengman, Charlotte Häger, Umeå University

|                                       |               |                         |                                                   |         |      |                                               |                                           |                                                                      |     |                                                                                  |                                                                                                                                                                                                          |          |
|---------------------------------------|---------------|-------------------------|---------------------------------------------------|---------|------|-----------------------------------------------|-------------------------------------------|----------------------------------------------------------------------|-----|----------------------------------------------------------------------------------|----------------------------------------------------------------------------------------------------------------------------------------------------------------------------------------------------------|----------|
| Australia                             |               |                         |                                                   |         |      |                                               | light activity at follow-up               |                                                                      |     | specific cut-off for tibial slope (>12<degrees)                                  | was associated with a higher risk of graft rupture (HR=3.0, p=0.001)                                                                                                                                     |          |
| Sanders et al. 2017 [37] USA          | Retrospective | 535 females, 820 males  | Patella autograft, hamstring autograft, allograft | 72 (5)  | 58.8 | 26.6 (9.9)                                    | NR                                        | Timing of surgery (>12<months), age (>22<years), associated injuries | 10  | Statistics not possible to re-calculate to OR                                    | Age <22 years (p=0.04) and timing of surgery >12 months post injury (HR=1.10, p=0.009) were associated with a higher risk of graft rupture. Meniscal tear was not associated with graft rupture (p>0.05) | Low      |
| Shelbourne et al. 1998 [38] USA       | Prospective   | 234 women, 480 men      | Patella                                           | 19 (3)  | NR   | 24.3                                          | Noyes score: 99.7% > 12 at primary injury | Joint geometry                                                       | NR  | Only study including specific risk factor with specific cut-Off (≤15mm vs ≥16mm) | No difference in graft rupture rate between those with an intercondylar femoral notch width ≤15mm (2.3%) and those ≥16mm (3.1%), p=0.628.                                                                | Moderate |
| Schlumberger et al. 2017 [39] Germany | Retrospective | 916 females, 1551 males | Hamstring, quadriceps                             | 73 (3)  | NR   | 32.4 (12.2)                                   | NR                                        | Age                                                                  | 5   | Statistics not possible to re-calculate to OR                                    | No association between age and graft rupture (p>0.05)                                                                                                                                                    | Moderate |
| Tulloch et al. 2019 [40] Australia    | Retrospective | 23 females, 32 males    | LARS                                              | 17 (31) | 46.8 | Graft rupture: 34.6<br>No graft rupture: 36.6 | Cincinatti score at primary injury: 70    | Pre injury activity level                                            | 7.8 | Only study including specific risk factor (Cincinatti-score)                     | No difference in pre-injury activity level between those who sustained an graft rupture and those who did not (p>0.05)                                                                                   | Low      |
| Webster et al. 2019 [41] Australia    | Prospective   | 129 females, 200 males  | Hamstring                                         | 50 (15) | 33   | 17.2 (2)                                      | NR                                        | Post operative extension and                                         | 5   | Only study including specific risk                                               | Larger flexion deficits (OR=2.3,                                                                                                                                                                         | High     |

Return to sports - a risky business? A systematic review with meta-analysis of risk factors for graft rupture following ACL reconstruction, Sports Medicine, Anna Cronström; anna.cronstrom@umu.se, Eva Tengman, Charlotte Häger, Umeå University

|                                    |               |                        |                                |         |    |            |                                                 |                               |     |                                                                                             |                                                                                                                                                           |      |
|------------------------------------|---------------|------------------------|--------------------------------|---------|----|------------|-------------------------------------------------|-------------------------------|-----|---------------------------------------------------------------------------------------------|-----------------------------------------------------------------------------------------------------------------------------------------------------------|------|
|                                    |               |                        |                                |         |    |            |                                                 | flexion deficits, knee laxity |     | factors at specific time point (12 months post surgery)                                     | p=0.05) were associated with graft rupture. No association between extension deficits (OR=0.4, p>0.05) or knee laxity (OR=0.9, p>0.05) and graft rupture. |      |
| Webster et al. 2021 [42] Australia | Prospective   | 56 females, 73 males   | Patella, quadriceps, hamstring | 20 (16) | 29 | 17 (1.9)   | 91% participated in cutting and pivoting sports | Timing of RTS                 | 3.4 | Only study including specific risk factor with adequate statistics                          | No difference in graft rupture rate between those who returned to sport ≥12 months vs <12 months post reconstruction (p>0.005)                            | High |
| Yabroudi et al. 2016 [43] USA      | Retrospective | 139 females, 112 males | Autograft, allograft           | 21 (8)  | NR | 26.1 (9.9) | 58% competitive level at primary injury         | Pre-injury activity level     | 3.4 | Only study including specific risk factor with specific cut-offs (Marx activity score >12<) | Marx score >12 was associated with graft rupture (OR=3.27, p=0.023).                                                                                      | High |

NR = not reported, RTS = return to sport, LARS = Ligament Advanced Reinforcement System, BMI = Body Mass Index, IKDC = International Knee Documentation Committee subjective knee form, OR = odds ratio, RR = risk ratio, HR = hazard ratio, AFL = Australian Football league, EQ5D = EuroQol – 5 – dimension descriptive system, NSAID = Non-Steroidal Anti-inflammatory Drug, RoB = risk of bias

## References

1. DeFrancesco CJ, Striano BM, Bram JT, Baldwin KD, Ganley TJ: **An In-Depth Analysis of Graft Rupture and Contralateral Anterior Cruciate Ligament Rupture Rates After Pediatric Anterior Cruciate Ligament Reconstruction.** *Am J Sports Med* 2020, **48**(10):2395-2400.
2. Della Villa F, Hägglund M, Della Villa S, Ekstrand J, Waldén M: **High rate of second ACL injury following ACL reconstruction in male professional footballers: an updated longitudinal analysis from 118 players in the UEFA Elite Club Injury Study.** *Br J Sports Med* 2021.

3. Gagliardi AG, Carry PM, Parikh HB, Traver JL, Howell DR, Albright JC: **ACL Repair With Suture Ligament Augmentation Is Associated With a High Failure Rate Among Adolescent Patients.** *Am J Sports Med* 2019, **47**(3):560-566.
4. Gans I, Retzky JS, Jones LC, Tanaka MJ: **Epidemiology of Recurrent Anterior Cruciate Ligament Injuries in National Collegiate Athletic Association Sports: The Injury Surveillance Program, 2004-2014.** *Orthop J Sports Med* 2018, **6**(6):2325967118777823.
5. Gonçalves H, Steltzlen C, Boisrenoult P, Beaufile P, Pujol N: **High failure rate of anterior cruciate ligament reconstruction with bimeniscal repair: A case-control study.** *Orthop Traumatol Surg Res* 2017, **103**(6):943-946.
6. Kinsella SD, Rider SM, Fury MS, Tepolt FA, Ecklund K, Kocher MS: **Concomitant Posterolateral Corner Injuries in Skeletally Immature Patients With Acute Anterior Cruciate Ligament Injuries.** *J Pediatr Orthop* 2020, **40**(6):271-276.
7. Lai CCH, Feller JA, Webster KE: **Fifteen-Year Audit of Anterior Cruciate Ligament Reconstructions in the Australian Football League From 1999 to 2013: Return to Play and Subsequent ACL Injury.** *Am J Sports Med* 2018, **46**(14):3353-3360.
8. Levins JG, Sturnick DR, Argentieri EC, Gardner-Morse M, Vacek PM, Desarno MJ, Tourville TW, Slaughterbeck JR, Beynon BD: **Geometric Risk Factors Associated With Noncontact Anterior Cruciate Ligament Graft Rupture.** *Am J Sports Med* 2016, **44**(10):2537-2545.
9. Magnussen RA, Reinke EK, Huston LJ, Hewett TE, Spindler KP, Amendola A, Andrich JT, Brophy RH, Dunn WR, Flanigan DC *et al*: **Effect of High-Grade Preoperative Knee Laxity on 6-Year Anterior Cruciate Ligament Reconstruction Outcomes.** *Am J Sports Med* 2018, **46**(12):2865-2872.
10. Patel NM, Talathi NS, Bram JT, DeFrancesco CJ, Ganley TJ: **How Does Obesity Impact Pediatric Anterior Cruciate Ligament Reconstruction?** *Arthroscopy* 2019, **35**(1):130-135.
11. Paterno MV, Flynn K, Thomas S, Schmitt LC: **Self-Reported Fear Predicts Functional Performance and Second ACL Injury After ACL Reconstruction and Return to Sport: A Pilot Study.** *Sports Health* 2018, **10**(3):228-233.
12. Sonnery-Cottet B, Saithna A, Cavalier M, Kajetanek C, Temponi EF, Daggett M, Helito CP, Thauinat M: **Anterolateral Ligament Reconstruction Is Associated With Significantly Reduced ACL Graft Rupture Rates at a Minimum Follow-up of 2 Years: A Prospective Comparative Study of 502 Patients From the SANTI Study Group.** *Am J Sports Med* 2017, **45**(7):1547-1557.
13. Benner RW, Shelbourne KD, Gray T: **The Degree of Knee Extension Does Not Affect Postoperative Stability or Subsequent Graft Tear Rate After Anterior Cruciate Ligament Reconstruction With Patellar Tendon Autograft.** *Am J Sports Med* 2016, **44**(4):844-849.
14. Cooper DE, Dunn WR, Huston LJ, Haas AK, Spindler KP, Allen CR, Anderson AF, DeBerardino TM, Lantz BBA, Mann B *et al*: **Physiologic Preoperative Knee Hyperextension Is a Predictor of Failure in an Anterior Cruciate Ligament Revision Cohort: A Report From the MARS Group.** *Am J Sports Med* 2018, **46**(12):2836-2841.
15. Cruz AI, Jr., Fabricant PD, McGraw M, Rozell JC, Ganley TJ, Wells L: **All-Epiphyseal ACL Reconstruction in Children: Review of Safety and Early Complications.** *J Pediatr Orthop* 2017, **37**(3):204-209.
16. Csapo R, Runer A, Hoser C, Fink C: **Contralateral ACL tears strongly contribute to high rates of secondary ACL injuries in professional ski racers.** *Knee Surg Sports Traumatol Arthrosc* 2021, **29**(6):1805-1812.
17. Engelman GH, Carry PM, Hitt KG, Polousky JD, Vidal AF: **Comparison of allograft versus autograft anterior cruciate ligament reconstruction graft survival in an active adolescent cohort.** *Am J Sports Med* 2014, **42**(10):2311-2318.
18. Digiacoio JE, Palmieri-Smith RM, Redman JA, III, Lepley LK: **Examination of Knee Morphology After Secondary Ipsilateral ACL Injury Compared With Those That Have Not Been Reinjured: A Preliminary Study.** *J Sport Rehabil* 2018, **27**(1):73-82.

19. Fältstrom A, Hagglund M, Magnusson H, Forssblad M, Kvist J: **Predictors for additional anterior cruciate ligament reconstruction: data from the Swedish national ACL register.** *Knee Surg Sports Traumatol Arthrosc* 2016, **24**(3):885-894.
20. Ghosh K, Salmon LJ, Heath E, Pinczewski LA, Roe JP: **Transphyseal anterior cruciate ligament reconstruction using living parental donor hamstring graft: excellent clinical results at 2 years in a cohort of 100 patients.** *Knee Surg Sports Traumatol Arthrosc* 2020, **28**(8):2511-2518.
21. Grassi A, Signorelli C, Urrizola F, Macchiarola L, Raggi F, Mosca M, Samuelsson K, Zaffagnini S: **Patients With Failed Anterior Cruciate Ligament Reconstruction Have an Increased Posterior Lateral Tibial Plateau Slope: A Case-Controlled Study.** *Arthroscopy* 2019, **35**(4):1172-1182.
22. Heath EL, Salmon LJ, Cooper R, Pappas E, Roe JP, Pinczewski LA: **5-Year Survival of Pediatric Anterior Cruciate Ligament Reconstruction With Living Donor Hamstring Tendon Grafts.** *Am J Sports Med* 2019, **47**(1):41-51.
23. Henle P, Bieri KS, Brand M, Aghayev E, Bettfuehr J, Haeberli J, Kess M, Egli S: **Patient and surgical characteristics that affect revision risk in dynamic intraligamentary stabilization of the anterior cruciate ligament.** *Knee Surg Sports Traumatol Arthrosc* 2018, **26**(4):1182-1189.
24. Kamien PM, Hydrick JM, Replogle WH, Go LT, Barrett GR: **Age, graft size, and Tegner activity level as predictors of failure in anterior cruciate ligament reconstruction with hamstring autograft.** *Am J Sports Med* 2013, **41**(8):1808-1812.
25. Kim SH, Park YB, Kim DH, Pujol N, Lee HJ: **Predictive factors for failure of anterior cruciate ligament reconstruction via the trans-tibial technique.** *Arch Orthop Trauma Surg* 2020, **140**(10):1445-1457.
26. King E, Richter C, Daniels KAJ, Franklyn-Miller A, Falvey E, Myer GD, Jackson M, Moran R, Strike S: **Biomechanical but Not Strength or Performance Measures Differentiate Male Athletes Who Experience ACL Reinjury on Return to Level 1 Sports.** *Am J Sports Med* 2021, **49**(4):918-927.
27. Krismer AM, Gousopoulos L, Kohl S, Ateschrang A, Kohlhof H, Ahmad SS: **Factors influencing the success of anterior cruciate ligament repair with dynamic intraligamentary stabilisation.** *Knee Surg Sports Traumatol Arthrosc* 2017, **25**(12):3923-3928.
28. Kyritsis P, Bahr R, Landreau P, Miladi R, Witvrouw E: **Likelihood of ACL graft rupture: not meeting six clinical discharge criteria before return to sport is associated with a four times greater risk of rupture.** *Br J Sports Med* 2016, **50**(15):946-951.
29. Mitchell BC, Siow MY, Bastrom T, Bomar JD, Pennock AT, Parvaresh K, Edmonds EW: **Predictive Value of the Magnetic Resonance Imaging-Based Coronal Lateral Collateral Ligament Sign on Adolescent Anterior Cruciate Ligament Reconstruction Graft Failure.** *Am J Sports Med* 2021, **49**(4):935-940.
30. Mohtadi N, Chan D, Barber R, Paolucci EO: **Reruptures, Reinjuries, and Revisions at a Minimum 2-Year Follow-up: A Randomized Clinical Trial Comparing 3 Graft Types for ACL Reconstruction.** *Clin J Sport Med* 2016, **26**(2):96-107.
31. Poston GR, Schmitt LC, Ithurburn MP, Hugentobler JA, Thomas S, Paterno MV: **Reduced 2-D Frontal Plane Motion During Single-Limb Landing Is Associated With Risk of Future Anterior Cruciate Ligament Graft Rupture After Anterior Cruciate Ligament Reconstruction and Return to Sport: A Pilot Study.** *J Orthop Sports Phys Ther* 2021, **51**(2):82-87.
32. Pinczewski LA, Lyman J, Salmon LJ, Russell VJ, Roe J, Linklater J: **A 10-year comparison of anterior cruciate ligament reconstructions with hamstring tendon and patellar tendon autograft: a controlled, prospective trial.** *Am J Sports Med* 2007, **35**(4):564-574.



33. Pullen WM, Bryant B, Gaskill T, Sicignano N, Evans AM, DeMaio M: **Predictors of Revision Surgery After Anterior Cruciate Ligament Reconstruction.** *Am J Sports Med* 2016, **44**(12):3140-3145.
34. Rosenstiel N, Praz C, Ouanezar H, Saithna A, Fournier Y, Hager JP, Thauinat M, Sonnery-Cottet B: **Combined Anterior Cruciate and Anterolateral Ligament Reconstruction in the Professional Athlete: Clinical Outcomes From the Scientific Anterior Cruciate Ligament Network International Study Group in a Series of 70 Patients With a Minimum Follow-Up of 2 Years.** *Arthroscopy* 2019, **35**(3):885-892.
35. Salmon LJ, Russell VJ, Refshauge K, Kader D, Connolly C, Linklater J, Pinczewski LA: **Long-term outcome of endoscopic anterior cruciate ligament reconstruction with patellar tendon autograft: minimum 13-year review.** *Am J Sports Med* 2006, **34**(5):721-732.
36. Salmon LJ, Heath E, Akrawi H, Roe JP, Linklater J, Pinczewski LA: **20-Year Outcomes of Anterior Cruciate Ligament Reconstruction With Hamstring Tendon Autograft: The Catastrophic Effect of Age and Posterior Tibial Slope.** *Am J Sports Med* 2018, **46**(3):531-543.
37. Sanders TL, Pareek A, Hewett TE, Levy BA, Dahm DL, Stuart MJ, Krych AJ: **Long-term rate of graft failure after ACL reconstruction: a geographic population cohort analysis.** *Knee Surg Sports Traumatol Arthrosc* 2017, **25**(1):222-228.
38. Shelbourne KD, Davis TJ, Klootwyk TE: **The relationship between intercondylar notch width of the femur and the incidence of anterior cruciate ligament tears. A prospective study.** *Am J Sports Med* 1998, **26**(3):402-408.
39. Schlumberger M, Schuster P, Schulz M, Immendörfer M, Mayer P, Bartholomä J, Richter J: **Traumatic graft rupture after primary and revision anterior cruciate ligament reconstruction: retrospective analysis of incidence and risk factors in 2915 cases.** *Knee Surg Sports Traumatol Arthrosc* 2017, **25**(5):1535-1541.
40. Tulloch SJ, Devitt BM, Porter T, Hartwig T, Klemm H, Hookway S, Norsworthy CJ: **Primary ACL reconstruction using the LARS device is associated with a high failure rate at minimum of 6-year follow-up.** *Knee Surg Sports Traumatol Arthrosc* 2019, **27**(11):3626-3632.
41. Webster KE, Feller JA: **Clinical Tests Can Be Used to Screen for Second Anterior Cruciate Ligament Injury in Younger Patients Who Return to Sport.** *Orthop J Sports Med* 2019, **7**(8):2325967119863003.
42. Webster KE, Feller JA, Klemm HJ: **Second ACL Injury Rates in Younger Athletes Who Were Advised to Delay Return to Sport Until 12 Months After ACL Reconstruction.** *Orthop J Sports Med* 2021, **9**(2):2325967120985636.
43. Yabroudi MA, Björnsson H, Lynch AD, Muller B, Samuelsson K, Tarabichi M, Karlsson J, Fu FH, Harner CD, Irrgang JJ: **Predictors of Revision Surgery After Primary Anterior Cruciate Ligament Reconstruction.** *Orthop J Sports Med* 2016, **4**(9):2325967116666039.
