# Supplementary material for: Return to Sports: A Risky Business? A Systematic Review with Meta-Analysis of Risk Factors for Graft Rupture Following ACL Reconstruction
Source: PubMed Central journal article supplement (PMC9807539; doi:10.1007/s40279-022-01747-3), 2022-08-24
Supplement: 40279_2022_1747_MOESM4_ESM.pdf [file 40279_2022_1747_MOESM4_ESM.pdf]

Return to sports - a risky business? A systematic review with meta-analysis of risk factors for graft rupture following ACL reconstruction, Sports Medicine, Anna Cronström; anna.cronstrom@umu.se, Eva Tengman, Charlotte Häger, Umeå University

**Online resource 4.**

**Table 1.** Characteristics of the studies included in the meta-analysis

| Article, year & country                  | Study design  | Participants (n)       | Graft type                                           | Number of graft ruptures (n (%)) | Time to graft rupture (mean months) | Age Mean (sd/range)                                               | Activity level /sports participation           | Risk factor(s)                | Follow-up (mean/range, years) | RoB      |
|------------------------------------------|---------------|------------------------|------------------------------------------------------|----------------------------------|-------------------------------------|-------------------------------------------------------------------|------------------------------------------------|-------------------------------|-------------------------------|----------|
| Adults, adolescents and children pooled  |               |                        |                                                      |                                  |                                     |                                                                   |                                                |                               |                               |          |
| Akhtar et al. 2016 [1]<br>United Kingdom | Retrospective | 54 females, 129 males  | Hamstring autograft, patella autograft               | 44 (24)                          | 68                                  | With graft rupture: 28 (16-51), Without graft rupture: 28 (15-57) | NR                                             | Generalized joint laxity      | NR                            | High     |
| Akada et al. 2019 [2]<br>Japan           | Retrospective | 220 females, 206 males | Hamstring                                            | 14 (3)                           | 8.5                                 | 28.4                                                              | Tegner score: 7.0 at primary injury            | Associated injuries           | 2                             | High     |
| Allen et al. 2016 [3]<br>USA             | Retrospective | 180 females            | Hamstring autograft, patella autograft, allograft    | 11 (6)                           | 24.8                                | 19.6 (6.9)                                                        | Tegner score: 7.9 at primary injury            | Playing soccer, RTS           | 5.7                           | Low      |
| Annear et al. 2019 [4]<br>Australia      | Prospective   | 19 females, 23 males   | Hamstring autograft                                  | 5 (12)                           | 7 to 49                             | 28.9 (10.6)                                                       | NR                                             | Age, sex, associated injuries | 10                            | High     |
| Barrett et al. 2011 [5]<br>USA           | Retrospective | 179 females, 238 males | Patella autograft, allograft<br>Hamstrings autograft | 63 (15)                          | NR                                  | <25: 17.8 (12-25), >25: 39 (26-59)                                | <25: Post operative Tegner score 5.7, >25: 4.3 | Age                           | 5.2                           | High     |
| Beischer et al. 2020 [6]<br>Sweden       | Retrospective | 70 females, 89 males   | Patella, hamstring, quadriceps autograft, allograft  | 10 (6)                           | NR                                  | 21 (4.4)                                                          | Tegner score >6 at primary injury              | Age, sex, activity level      | 1.3 (after RTS)               | Moderate |

Return to sports - a risky business? A systematic review with meta-analysis of risk factors for graft rupture following ACL reconstruction, Sports Medicine, Anna Cronström; anna.cronstrom@umu.se, Eva Tengman, Charlotte Häger, Umeå University

|                                  |               |                         |                                                   |         |      |                                                                   |                                                                               |                                                    |                  |          |
|----------------------------------|---------------|-------------------------|---------------------------------------------------|---------|------|-------------------------------------------------------------------|-------------------------------------------------------------------------------|----------------------------------------------------|------------------|----------|
| Benner et al. 2016 [7] USA       | Prospective   | 553 (females/male s NR) | Patella autograft                                 | 42 (8)  | NR   | With graft rupture: 18.6 (5.1), without graft rupture: 23.7 (9.4) | Activity score: 8.4                                                           | age                                                | 4.1              | Moderate |
| Bodkin et al. 2021 [8] USA       | Prospective   | 104 females, 88 males   | Patella, hamstring                                | 24 (13) | NR   | 21.2 (9.2)                                                        | Tegner score at primary injury: 8.6                                           | Sex, RTS                                           | 2                | Low      |
| Bourke et al. 2012[9] Australia  | Retrospective | 241 females, 432 males  | Hamstring autograft, patella autograft            | 75 (11) | 60   | 29 (13-62)                                                        | NR                                                                            | Age, sex, family history, RTS, associated injuries | 16               | Moderate |
| Christensen et al. 2015 [10] USA | Retrospective | 28 females, 42 males    | Hamstring autograft, patella autograft, allograft | 35 (50) | 12   | 21                                                                | NR                                                                            | Tibial slope                                       | 6.9              | Low      |
| Cooper et al. 2018 [11] USA      | Prospective   | 484 females, 661 males  | Patella autograft, allograft                      | 34 (3)  | NR   | 26                                                                | NR                                                                            | Age, sex                                           | 2                | High     |
| Csapo et al. 2021 [12] Austria   | Retrospective | 17 females, 13 males    | Hamstring, quadriceps                             | 5 (17)  | 29.4 | 21.6 (4.0)                                                        | Professional ski racers at primary injury                                     | Sex                                                | At least 2 years | High     |
| Digiacoimo et al. 2018 [13] USA  | Prospective   | 12 females, 16 males    | Patella, semitendinosus, quadriceps               | 14 (50) | 16.4 | Graft rupture: 17.9 (4.0)<br>No graft rupture: 18.7 (4.0)         | Tegner score at primary injury<br>Graft rupture: 8.6<br>No graft rupture: 8.0 | Tibial slope                                       | 4                | Moderate |
| Everhart et al. 2020 [14] USA    | Prospective   | 205 females, 303 males  | Hamstring autograft, allograft, hybrid graft      | 31 (6)  | 17.6 | 24 (8.2)                                                          | NR                                                                            | Associated injuries                                | 3.2              | Low      |

Return to sports - a risky business? A systematic review with meta-analysis of risk factors for graft rupture following ACL reconstruction, Sports Medicine, Anna Cronström; anna.cronstrom@umu.se, Eva Tengman, Charlotte Häger, Umeå University

|                                   |                 |                              |                                                                 |          |    |                                                                 |                                                                                     |                                                                  |         |          |
|-----------------------------------|-----------------|------------------------------|-----------------------------------------------------------------|----------|----|-----------------------------------------------------------------|-------------------------------------------------------------------------------------|------------------------------------------------------------------|---------|----------|
| Fleming et al. 2013 [15] USA      | Prospective RCT | 48 females, 42 males         | Patella autograft, hamstring autograft                          | 6 (7)    | NR | Low tension: 24 (2.7)<br>High tension: 23 (2.1)                 | Tegner score at primary injury<br>Low tension: 7.6<br>High tension: 7.6             | Age, sex, associated injuries, activity level                    | 3       | Moderate |
| Fältström et al. 2016 [16] Sweden | Retrospective   | 8 986 females, 11 838 males  | Hamstring autograft                                             | 702 (3)  | NR | Graft rupture: 21.9 (7.3)<br>No graft rupture: 27 (9.9)         | Soccer, other contact ball sports, other sport/recreation, other (causes of injury) | Timing of surgery, KOOS score                                    | 0.5-8.6 | Low      |
| Fältström et al. 2021 [17] Sweden | Prospective     | 117 females                  | NR                                                              | 21 (18)  | NR | 20 (2)                                                          | All soccer players                                                                  | Hop performance                                                  | 2       | Moderate |
| Gifstad et al. 2014 [18] Norway   | Retrospective   | 19 031 females, 26 371 males | Patella autograft, hamstring autograft, allograft, other grafts | 1198 (3) | NR | Patella autograft: 29 (13-71)<br>Hamstring autograft: 26 (7-90) | 93% injured during sport participation                                              | Age, sex, playing soccer, associated injuries                    | 3       | Low      |
| Goshima et al. 2014 [19] Japan    | Retrospective   | 160 females, 73 males        | NR                                                              | 12 (5)   | NR | 21 (14-51)                                                      | Tegner score: 7 (Time point NR)                                                     | Family history                                                   | 2       | High     |
| Grassi et al. 2020 [20] Italy     | Retrospective   | 58 females, 186 males        | Hamstring autograft                                             | 8 (3)    | 44 | 30.7 (10.6)                                                     | Tegner score<br>≥7: 44%<br><7: 56%                                                  | Age, sex, BMI, smoking status, timing of surgery, activity level | 10      | Low      |
| Grassi et al. 2019 [21] Italy     | Retrospective   | 18 females, 68 males         | Hamstring autograft                                             | 43 (50)  | NR | Graft rupture: 21.8 (q1-q3: 18.7-26.7)                          | NR                                                                                  | Tibial slope, femoral condyle ratio                              | 3       | Low      |

Return to sports - a risky business? A systematic review with meta-analysis of risk factors for graft rupture following ACL reconstruction, Sports Medicine, Anna Cronström; anna.cronstrom@umu.se, Eva Tengman, Charlotte Häger, Umeå University

|                                    |               |                          |                                                              |         |      |                                                               |                                                                              |                                               |     |      |
|------------------------------------|---------------|--------------------------|--------------------------------------------------------------|---------|------|---------------------------------------------------------------|------------------------------------------------------------------------------|-----------------------------------------------|-----|------|
|                                    |               |                          |                                                              |         |      | Controls:<br>23.3 (q1-<br>q3: 19.6-<br>23.2)                  |                                                                              |                                               |     |      |
| Gupta et al. 2020 [22] India       | Retrospective | 26 females, 314 males    | Patella, hamstring                                           | 8 (2)   | 25.5 | 26 (5.5)                                                      | Tegner score at primary injury<br>Graft rupture: 9.1<br>No graft rupture: NR | Age, sex                                      | 10  | High |
| t 2018 [23] Switzerland            | Prospective   | 186 females, 195 males   | LARS                                                         | 30 (8)  | NR   | 33 (12)                                                       | Tegner score at primary injury: Graft rupture: 6, controls: 5                | Age, sex, BMI, smoking status, activity level | 2.5 | Low  |
| Henle et al. 2018 [24] Switzerland | Prospective   | 47 females, 51 males     | LARS                                                         | 11 (11) | NR   | 31.5 (9.8)                                                    | Tegner score at primary injury: 5                                            | Age, Sex, activity level                      | 2   | Low  |
| Ifran et al. 2020 [25] Singapore   | Retrospective | 153 females, 598 males   | Hamstring autograft, allograft, patella autograft, allograft | 44 (6)  | 32   | 23 (14-60)                                                    | NR                                                                           | Age, sex, BMI                                 | 2-7 | Low  |
| Jaeger et al. 2018 [26] Germany    | Retrospective | 41 females, 85 males     | Patella autograft, hamstring autograft                       | 57 (45) | NR   | Graft rupture: 26.6 (18-46)<br>No graft rupture: 31.9 (18-68) | NR                                                                           | Tibial slope                                  | NR  | Low  |
| Kaeding et al. 2017 [27] USA       | Prospective   | 1129 females, 1368 males | Patella autograft, hamstring                                 | 112 (4) | NR   | 26.9 (11.4)                                                   | Marx score at primary injury: 11.3                                           | Age, sex, BMI, smoking status,                | 2   | Low  |

Return to sports - a risky business? A systematic review with meta-analysis of risk factors for graft rupture following ACL reconstruction, Sports Medicine, Anna Cronström; anna.cronstrom@umu.se, Eva Tengman, Charlotte Häger, Umeå University

|                                         |               |                            |                                                 |         |      |                                                                        |                                                                                       |                                                                                              |     |          |
|-----------------------------------------|---------------|----------------------------|-------------------------------------------------|---------|------|------------------------------------------------------------------------|---------------------------------------------------------------------------------------|----------------------------------------------------------------------------------------------|-----|----------|
|                                         |               |                            | autograft,<br>allograft                         |         |      |                                                                        |                                                                                       | associated<br>injuries,<br>playing<br>soccer,<br>activity level                              |     |          |
| Kajetanek et al. 2017 [28]<br>France    | Retrospective | 160 females,<br>227 males  | Hamstring<br>autograft                          | 20 (5)  | 25   | 28.6 (13-<br>58)                                                       | Tegner score<br>at primary<br>injury: 5.2                                             | Age, sex,<br>tibial slope,<br>Activity level                                                 | 2.2 | Moderate |
| Kamien et al. 2013 [29]<br>USA          | Retrospective | 98 (females,<br>males NR)  | Hamstring                                       | 15 (15) | NR   | Range. 12-<br>52                                                       | Tegner score<br>(time point<br>NR): Graft<br>rupture: 5.5<br>No graft<br>rupture: 4.8 | Age, sex                                                                                     | 2   | High     |
| Kim et al. 2020 [30]<br>South Korea     | Retrospective | 19 females,<br>101 males   | NR                                              | 31 (26) | NR   | Graft<br>rupture:<br>29.3 (8.3)<br>No graft<br>ruptures:<br>31.1 (7.9) | Pre-operative<br>Tegner score:<br>3                                                   | Age, sex,<br>BMI, tibial<br>slope,<br>Associated<br>injuries                                 | 4.1 | Low      |
| King et al. 2020 [31]<br>Ireland        | Prospective   | 364 females,<br>1068 males | Patella<br>autograft,<br>hamstring<br>autograft | 39 (3)  | 21.4 | 24.4 (7.3)                                                             | Pre-operative<br>Marx score:<br>10.9                                                  | Age, sex,<br>associated<br>injuries,<br>contact/non-<br>contact<br>injury,<br>activity level | 2.4 | Low      |
| King et al. 2021 [32]<br>Ireland        | Prospective   | 88 males                   | Patella,<br>hamstring                           | 31 (35) | 19.8 | 18 - 35                                                                | All played<br>multidirectional<br>field sport<br>at primary<br>injury                 | Hop<br>performance<br>, knee<br>strength,<br>Psychological<br>readiness<br>to RTS            | 2   | High     |
| Krismer et al. 2017 [33]<br>Switzerland | Retrospective | 109 females,<br>155 males  | LARS                                            | 25 (9)  | 7.1  | 30.8 (12.2)                                                            | Tegner score<br>at primary<br>injury: 7                                               | Age, sex,<br>BMI, activity<br>level,                                                         | 2   | Moderate |

Return to sports - a risky business? A systematic review with meta-analysis of risk factors for graft rupture following ACL reconstruction, Sports Medicine, Anna Cronström; anna.cronstrom@umu.se, Eva Tengman, Charlotte Häger, Umeå University

|                                   |               |                       |                                                   |         |                                                      |                                                                                            |                                                  | associated injuries                                   |                 |      |
|-----------------------------------|---------------|-----------------------|---------------------------------------------------|---------|------------------------------------------------------|--------------------------------------------------------------------------------------------|--------------------------------------------------|-------------------------------------------------------|-----------------|------|
| Krosshaug et al. 2016 [34] Norway | Prospective   | 59 females            | NR                                                | 4 (7)   | NR                                                   | Graft rupture: 22.7 (3.8) including n=8 with C-ACL injury)<br>No graft rupture: 23.6 (4.1) | Premier league handball players                  | Knee abduction                                        | 1-7             | Low  |
| Kyrtsis et al. 2016 [35] Qatar    | Prospective   | 158 males             | Patella, hamstring                                | 26 (16) | 3.5 (after RTS)                                      | Graft rupture: 22 (5)<br>No graft rupture: 21 (4)                                          | Professional athletes                            | Age, playing soccer, hop performance, muscle strength | 2.5 (after RTS) | Low  |
| Laboute et al. 2010 [36] France   | Retrospective | 64 females, 234 males | Patella autograft, hamstring autograft            | 26 (9)  | Patella autograft : 21.8<br>Hamstring autograft : 22 | Graft rupture: 24 (6)<br>No graft rupture: 26 (7.7)                                        | All athletes playing at regional level or higher | Age, sex, contact/non contact injury                  | 3.5             | High |
| Larson et al. 2017 [37] USA       | Prospective   | 102 females, 81 males | Patella autograft, hamstring autograft, allograft | 13 (7)  | NR                                                   | 26.9 (12-62)                                                                               | Tegner score at primary injury: 6.5              | Sex, general joint laxity                             | 6               | High |
| Lee et al. 2021 [38] South Korea  | Retrospective | 26 females, 72 males  | Hamstring                                         | 5 (5)   | NR                                                   | Adolescents: 17.4 (1.3), adults: 32.3 (4.9)                                                |                                                  | Age                                                   | 2.3             | Low  |
| Leys et al. 2012 [39] Australia   | Prospective   | 85 females, 95 males  | Patella autograft,                                | 22 (12) | NR                                                   | 24.5 (13-52)                                                                               | 81% participated in moderate-to-                 | Age, sex                                              | 15              | High |

Return to sports - a risky business? A systematic review with meta-analysis of risk factors for graft rupture following ACL reconstruction, Sports Medicine, Anna Cronström; anna.cronstrom@umu.se, Eva Tengman, Charlotte Häger, Umeå University

|                                      |               |                              | hamstring autograft                               |         |      |                      | strenuous activity at primary injury                      |                                     |     |          |
|--------------------------------------|---------------|------------------------------|---------------------------------------------------|---------|------|----------------------|-----------------------------------------------------------|-------------------------------------|-----|----------|
| Lord et al. 2020 [40] Sweden         | Retrospective | 2684 females<br>3346 males   | Hamstring autograft, patella autograft            | 146 (2) | NR   | 28.3 (10.7)          | NR                                                        | Age, Sex, associated injuries,      | 2   | Low      |
| Magnussen et al. 2012 [41] USA       | Retrospective | 120 females,<br>136 males    | Hamstring autograft                               | 18 (7)  | 12   | 25 (10.5)            | NR                                                        | Age, sex                            | 1.2 | High     |
| Maletis et al. 2015 [42] USA         | Retrospective | 6277 females,<br>11159 males | Patella autograft, hamstring autograft, allograft | 416 (2) | 17   | 27.2 (IR: 18.7-37.7) | NR                                                        | Age, sex, BMI                       | 2.4 | Low      |
| Mardani-Kivi et al. 2019 [43] Iran   | Retrospective | 179 females,<br>836 males    | Hamstring autograft                               | 33 (3)  | NR   | 34 (8.9)             | Sport inactivity – regular sport activity (Time point NA) | Age, sex, BMI, Family history       | 6.5 | High     |
| McPherson et al. 2019 [44] Australia | Prospective   | 118 females,<br>211 males    | Patella, hamstring, quadriceps, synthetic graft   | 34 (10) | NR   | 25.3 (8.7)           | Sports participation at primary injury                    | Sex, psychological readiness to RTS | 2   | Low      |
| Mohtadi et al. 2016 [45] Canada      | Prospective   | 147 females,<br>183 males    | Patella, hamstring                                | 17 (5)  | 18.3 | 28.5 (9.8)           | Tegner Score ≥ 5 at primary injury                        | Sex                                 | 2   | Low      |
| Okoroha et al. 2019 [46] USA         | Retrospective | 130 males                    | NR                                                | 23 (18) | NR   | 25.3 (3.2)           | NFL players                                               | Age                                 | NR  | Low      |
| Paterno et al. 2012 [47] USA         | Prospective   | 42 females,<br>21 males      | NR                                                | 4 (6)   | NR   | 16.3 (2.9)           | IKDC level 1-2                                            | Sex                                 | 1   | Moderate |
| Pfeiffer et al. 2018 [48] USA        | Retrospective | 38 females,<br>47 males      | NR                                                | 49 (6)  | NR   | 29.1 (9.7)           | NR                                                        | Femoral condyle ratio               | 4.4 | Moderate |

Return to sports - a risky business? A systematic review with meta-analysis of risk factors for graft rupture following ACL reconstruction, Sports Medicine, Anna Cronström; anna.cronstrom@umu.se, Eva Tengman, Charlotte Häger, Umeå University

|                                          |               |                             |                                                                       |         |                                                    |              |                                                             |                                                                  |      |      |
|------------------------------------------|---------------|-----------------------------|-----------------------------------------------------------------------|---------|----------------------------------------------------|--------------|-------------------------------------------------------------|------------------------------------------------------------------|------|------|
| Pinczewski et al. 2007 [49]<br>Australia | Prospective   | 85 females<br>95 males      | Patella autograft,<br>hamstring autograft                             | 19 (11) | Patella autografts: 63<br>Hamstring autografts: 50 | 25 (13-42)   | Pivoting, cutting or side-stepping sports at primary injury | Age, sex                                                         | 10   | High |
| Poston et al. 2020 [50]<br>USA           | Prospective   | 32 females,<br>17 males     | Hamstring autograft,<br>allograft,<br>patella autograft,<br>allograft | 7 (14)  | <24                                                | 16.5 (3.0)   | Pivoting or cutting sport at primary injury                 | Age, sex,<br>knee abduction                                      | 2    | Low  |
| Rahardja et al. 2020 [51]<br>New Zealand | Prospective   | 3111 females,<br>4291 males | NR                                                                    | 285 (4) | NR                                                 | 29.1 (10.9)  | NR                                                          | Age, sex,<br>timing of surgery,<br>associated injuries           | 1.9  | Low  |
| Riff et al. 2017 [52]<br>USA             | Retrospective | 929 females,<br>1296 males  | Patella autograft,<br>allograft,<br>hamstring autograft,<br>allograft | 40 (2)  | 54                                                 | 29.3 (15.1)  | NR                                                          | Age, sex                                                         | 15.7 | High |
| Rosenstiel et al. 2019 [53]<br>France    | Retrospective | 22 females,<br>48 males     | Hamstring autograft                                                   | 4 (6)   | 23.9                                               | 23.2 (15-37) | Tegner score: 9.3 at primary injury                         | Sex                                                              | 3.9  | Low  |
| Runer et al. 2020 [54]<br>Austria        | Prospective   | 345 females,<br>530 males   | Quadriceps autograft,<br>hamstring autograft                          | 38 (4)  | NR                                                 | 30.8 (12.4)  | Tegner score: 6 at primary injury                           | Age, sex,<br>activity level                                      | 2    | Low  |
| Salmon et al. 2005 [55]<br>Australia     | Prospective   | 289 females,<br>383 males   | Patella autograft,<br>hamstring autograft                             | 39 (6)  | 20                                                 | 28 (14-62)   | IKDC level 1-4 at primary injury                            | Sex, family history,<br>contact vs non-contact mechanism<br>RTS, | 5    | Low  |



Return to sports - a risky business? A systematic review with meta-analysis of risk factors for graft rupture following ACL reconstruction, Sports Medicine, Anna Cronström; anna.cronstrom@umu.se, Eva Tengman, Charlotte Häger, Umeå University

|                                          |               |                            |                                                   |         |      |              |                                                             | associated injuries      |      |          |
|------------------------------------------|---------------|----------------------------|---------------------------------------------------|---------|------|--------------|-------------------------------------------------------------|--------------------------|------|----------|
| Salmon et al. 2006 [56]<br>Australia     | Prospective   | 20 females,<br>47 males    | Patella autograft                                 | 9 (13)  | 77.3 | 27 (NR)      | Pivoting, cutting or side-stepping sports at primary injury | Sex, associated injuries | 13   | Low      |
| Salmon et al. 2018 [57]<br>Australia     | Prospective   | 74 females,<br>105 males   | Hamstring autograft                               | 37 (21) | NR   | 25.8         | Strenuous, moderate or light activity at follow-up          | Age, sex, family history | 19.7 | Low      |
| Sanders et al. 2017 [58]<br>USA          | Retrospective | 535 females,<br>820 males  | Patella autograft, hamstring autograft, allograft | 72 (5)  | 58.8 | 26.6 (9.9)   | NR                                                          | sex                      | 10   | Low      |
| Sandon et al. 2020 [59]<br>Sweden        | Retrospective | 252 females,<br>432 males  | Patella autograft, hamstring autograft, allograft | 34 (5)  | NR   | 23.5 (7.6)   | Soccer players                                              | RTS                      | 10   | High     |
| Sauer et al. 2019 [60]<br>Denmark        | Retrospective | 34 females,<br>86 males    | Hamstring                                         | 60 (50) | NR   | 22.5 (10-51) | NR                                                          | Tibial slope             | 4    | Low      |
| Schlumberger et al. 2017 [61]<br>Germany | Retrospective | 916 females,<br>1551 males | Hamstring, quadriceps                             | 73 (3)  | NR   | 32.4 (12.2)  | NR                                                          | Sex                      | 5    | Moderate |
| Shelbourne et al. 2009 [62]<br>USA       | Prospective   | 552 females,<br>863 males  | Patella autograft                                 | 61 (4)  | 19.2 | 21.6 (3.6)   | Tegner score: > 7 at primary injury                         | Age, sex, timing of RTS  | 5    | High     |
| Singhal et al. 2007 [63]<br>USA          | Retrospective | 31 females,<br>38 males    | Tibialis allograft                                | 16 (23) | 22   | 31.7 (19-69) | NR                                                          | Age                      | 4.5  | High     |
| Sousa et al. 2017 [64]<br>USA            | Prospective   | 131 females,<br>92 males   | Patella autograft, allograft,                     | 10 (4)  | 44   | 22 (12-59)   | Tegner score: >6.5 at primary injury                        | Sex, timing of RTS       | 4    | Low      |

Return to sports - a risky business? A systematic review with meta-analysis of risk factors for graft rupture following ACL reconstruction, Sports Medicine, Anna Cronström; anna.cronstrom@umu.se, Eva Tengman, Charlotte Häger, Umeå University

|                                      |               |                          |                                         |         |        |                                                           |                                                             |                                    |     |          |
|--------------------------------------|---------------|--------------------------|-----------------------------------------|---------|--------|-----------------------------------------------------------|-------------------------------------------------------------|------------------------------------|-----|----------|
|                                      |               |                          | hamstring autograft, allograft          |         |        |                                                           |                                                             |                                    |     |          |
| Su et al. 2020 [65] USA              | Retrospective | 59 females, 64 males     | NR                                      | 46 (37) | NR     | 21.2 (6.8)                                                | NR                                                          | Tibial slope                       | NR  | High     |
| Tagesson et al. 2016 [66] Sweden     | Prospective   | 8 females, 11 males      | Hamstring                               | 3 (16)  | 24-48  | Graft rupture: 21.3 (4)<br>No graft rupture: 21.7 (4.4)   | Tegner score: 7 at primary injury <sup>24-</sup>            | Age, sex, KOOS score               | 5   | Moderate |
| Thompson et al. 2015 [67] Australia  | Prospective   | 44 females, 46 men       | Patella autograft                       | 6 (7)   | 84     | 25 (15-42)                                                | Pivoting, cutting or side-stepping sports at primary injury | Age, sex, family history           | 20  | Low      |
| Van Eck et al. 2012 [68] USA         | Prospective   | 103 females, 103 males   | Hamstring allograft, tibialis allograft | 27 (13) | 11 (9) | 24 (10)                                                   | NR                                                          | Age, sex, BMI, associated injuries | 2.5 | Low      |
| Vincent et al. 2017 [69] China       | Retrospective | 3 females, 39 males      | Patella                                 | 9 (21)  | NR     | Graft rupture: 22.8 (3.6)<br>No graft rupture: 21.4 (4.4) | NR                                                          | Number of physical therapy visits  | 5   | Low      |
| Wasserstein et al. 2013 [70] USA     | Retrospective | 4708 females, 8259 males | Allograft, autograft                    | 336 (3) | 35     | 29.5 (10.5)                                               | NR                                                          | Age, sex                           | 5.2 | Low      |
| Webb et al. 2013 [71] Australia      | Prospective   | 90 females, 91 males     | Hamstring autograft                     | 31 (17) | 66     | 26                                                        | NR                                                          | Sex, tibial slope                  | 15  | High     |
| Welling et al. 2020 [72] Netherlands | Prospective   | 20 females, 44 males     | Patella autograft, allograft,           | 8 (13)  | NR     | 27.7 (8.8)                                                | Amateur team ball sports                                    | RTS                                | 2.1 | High     |

Return to sports - a risky business? A systematic review with meta-analysis of risk factors for graft rupture following ACL reconstruction, Sports Medicine, Anna Cronström; anna.cronstrom@umu.se, Eva Tengman, Charlotte Häger, Umeå University

|                                           |               |                           |                                                              |         |    |                 |                                                                   |                                                                                |     |          |
|-------------------------------------------|---------------|---------------------------|--------------------------------------------------------------|---------|----|-----------------|-------------------------------------------------------------------|--------------------------------------------------------------------------------|-----|----------|
|                                           |               |                           | hamstring autograft                                          |         |    |                 |                                                                   |                                                                                |     |          |
| Webster et al. 2014 [73]<br>Australia     | Retrospective | 191 females,<br>370 males | Autograft                                                    | 25 (4)  | 20 | 28.5 (9.9)      | NR                                                                | Age, sex, family history, RTS, associated injuries, contact/non-contact injury | 4.8 | Moderate |
| Webster et al. 2019 [74]<br>Australia     | Prospective   | 129 females,<br>200 males | Hamstring                                                    | 50 (15) | 33 | 17.2 (2)        | NR                                                                | Hop performance                                                                | 5   | High     |
| Webster et al. 2021 [75]<br>Australia     | Retrospective | 253 females,<br>405 males | Hamstring                                                    | 43 (7)  | NR | 26 (9)          | Marx activity score 8.9 - 9.8 at follow-up                        | Sex                                                                            | 2   | High     |
| Wright et al. 2007 [76]<br>USA            | Prospective   | 110 females,<br>125 males | Patella autograft, allograft, hamstring autograft, allograft | 7 (3)   | NR | 24 (11-54)      | NR                                                                | Sex                                                                            | 2   | High     |
| Yabroudi et al. 2016 [77]<br>USA          | Retrospective | 139 females,<br>112 males | Autograft, allograft                                         | 21 (8)  | NR | 26.1 (9.9)      | 58% competitive level at primary injury                           | Age, sex, BMI, RTS, timing of surgery                                          | 3.4 | High     |
| <i>Adults</i>                             |               |                           |                                                              |         |    |                 |                                                                   |                                                                                |     |          |
| Borton et al. 2018 [78]<br>United Kingdom | Retrospective | 76 females,<br>203 males  | Hamstring autograft                                          | 11 (4)  | 15 | 31 (IQR: 23-42) | NR                                                                | Sex                                                                            | 4   | High     |
| Filbay et al. 2017 [79]<br>Sweden         | Prospective   | 32 females,<br>86 males   | Patella autograft, hamstring autograft                       | 5 (4)   | NR | 26 (5)          | Moderate-high activity level (non professional) at primary injury | Age, BMI, smoking, activity level, number of physical therapy                  | 5   | Low      |

Return to sports - a risky business? A systematic review with meta-analysis of risk factors for graft rupture following ACL reconstruction, Sports Medicine, Anna Cronström; anna.cronstrom@umu.se, Eva Tengman, Charlotte Häger, Umeå University

|                                       |               |                           |                                         |         |      |                 |                                           |                                             |     |          |
|---------------------------------------|---------------|---------------------------|-----------------------------------------|---------|------|-----------------|-------------------------------------------|---------------------------------------------|-----|----------|
|                                       |               |                           |                                         |         |      |                 |                                           | visits, associated injuries                 |     |          |
| Lee et al. 2018 [80]<br>South Korea   | Retrospective | 12 females, 116 males     | Autograft, allograft                    | 64 (50) | 48.5 | 31 (18-60)      | NR                                        | Tibial slope                                | 3.1 | High     |
| Lee et al. 2017 [81]<br>South Korea   | Prospective   | 19 females, 61 males      | Hamstring autograft, tibialis allograft | 4 (5)   | 12   | 34.4 (9.8)      | NR                                        | Sex                                         | 2.5 | High     |
| Pullen et al. 2016 [82]<br>USA        | Retrospective | 2735 females, 13601 males | NR                                      | 587 (4) | 16.6 | 28.9 (7.6)      | 94% active duty military                  | Age, sex, BMI, smoking, associated injuries | 7   | Low      |
| Shelbourne et al. 1998 [83]<br>USA    | Prospective   | 234 women, 480 men        | Patella                                 | 19 (3)  | NR   | 24.3            | Noyes score: 99.7% > 12 at primary injury | Sex                                         | NR  | Moderate |
| Tulloch et al. 2019 [84]<br>Australia | Retrospective | 23 females, 32 males      | LARS                                    | 17 (30) | 46.8 | 36 (19-58)      | Cincinatti score at primary injury: 70    | sex                                         | 7.8 | Low      |
| <i>Children/Adolescents</i>           |               |                           |                                         |         |      |                 |                                           |                                             |     |          |
| Bayomy et al. 2019 [85]<br>USA        | Retrospective | 18 girls, 41 boys         | Hamstring autograft, allograft          | 6 (10)  | NR   | 12.5 (6.8-16)   | NR                                        | Sex                                         | 2.8 | Low      |
| Bram et al. 2020 [86]<br>USA          | Retrospective | 237 girls, 213 boys       | NR                                      | 56 (12) | NR   | 14.9 (2.2)      | 89% played sport at primary injury        | Sex, family history                         | 4.3 | High     |
| Britt et al. 2020 [87]<br>USA         | Retrospective | 71 girls                  | Hamstring, patella autograft            | 8 (11)  | <24  | 15.4 (1.3)      | Soccer players                            | RTS, associated injuries                    | 3.4 | Moderate |
| Cruz et al. 2017 [88]<br>USA          | Retrospective | 24 girls, 79 boys         | Allograft, autograft, hybrid            | 11 (11) | 23   | 12.1 (6.3-15.7) | NR                                        | Age, sex, BMI, associated injuries          | 1.8 | Low      |

Return to sports - a risky business? A systematic review with meta-analysis of risk factors for graft rupture following ACL reconstruction, Sports Medicine, Anna Cronström; anna.cronstrom@umu.se, Eva Tengman, Charlotte Häger, Umeå University

|                                  |               |                     |                                                                      |         |      |                |                                                             |                                               |           |          |
|----------------------------------|---------------|---------------------|----------------------------------------------------------------------|---------|------|----------------|-------------------------------------------------------------|-----------------------------------------------|-----------|----------|
| Ellis et al. 2012 [89] USA       | Retrospective | 56 girls, 34 boys   | Patella autograft, allograft                                         | 9 (10)  | 9    | 16 (14-18)     | All participated in high school athletics at primary injury | Sex                                           | 4-11      | Low      |
| Engelman et al. 2014 [90] USA    | Retrospective | 33 girls, 40 boys,  | Hamstring allograft, autograft                                       | 15 (21) | NR   | 15 (11.2-18.7) | NR                                                          | Sex                                           | 2.7 - 4.2 | High     |
| Fones et al. 2020 [91] USA       | Retrospective | 46 girls, 28 boys   | Hamstring allograft, autograft, Patella autograft                    | 8 (11)  | NR   | 15.9 (1.5)     | Athletes                                                    | Sex, RTS, associated injuries                 | 4         | Moderate |
| Ghosh et al. 2020 [92] Australia | Prospective   | 32 girls, 68 boys   | Hamstring allograft                                                  | 12 (12) | 11   | 14 (8-16)      | NR                                                          | Sex, family history                           | 2         | High     |
| Grassi et al. 2020 [93] Italy    | Prospective   | 30 girls, 64 boys   | Hamstring                                                            | 8 (9)   | NR   | 15.7 (1.5)     | 34% Tegner activity level >7 at primary injury              | Tibial slope                                  | >2        | Low      |
| Graziano et al. 2017 [94] USA    | Prospective   | 12 girls, 30 boys   | Hamstring autograft                                                  | 4 (10)  | 13.7 | 12 (10-15)     | All participated in sports at primary injury (level 1-3)    | Sex                                           | NR        | High     |
| Heath et al. 2019 [95] Australia | Retrospective | 82 girls. 166 boys  | Hamstring allograft                                                  | 51 (21) | 17.5 | 14.6 (8-17.9)  | > 86% participated in sports at primary injury              | Age, sex, family history, Growth plate status | 4.5       | Low      |
| Ho et al. 2018 [96] USA          | Retrospective | 264 girls, 297 boys | Patella autograft, allograft, hamstring autograft, allograft, hybrid | 54 (10) | 13.6 | 15.4 (5-19)    | NR                                                          | Age, sex, growth plate status                 | 1         | Low      |

Return to sports - a risky business? A systematic review with meta-analysis of risk factors for graft rupture following ACL reconstruction, Sports Medicine, Anna Cronström; anna.cronstrom@umu.se, Eva Tengman, Charlotte Häger, Umeå University

|                                     |               |                        |                                         |         |    |                 |                                                               |                                                    |      |      |
|-------------------------------------|---------------|------------------------|-----------------------------------------|---------|----|-----------------|---------------------------------------------------------------|----------------------------------------------------|------|------|
| Larson et al 2016 [97] USA          | Prospective   | 16 girls, 13 boys      | Hamstring autograft, tibialis allograft | 5 (17)  | NR | 13.9 (9-16)     | All participated in cutting/pivoting sports at primary injury | Age, sex                                           | 4    | Low  |
| Mitchell et al. 2021 [98] USA       | Retrospective | 83 females, 70 males   | Patella, quadriceps, hamstring          | 39 (25) | NR | 14.2 (9.3 – 19) | NR                                                            | Tibial slope                                       | 3.5  | Low  |
| Morgan et al. 2016 [99] Australia   | Prospective   | 104 girls, 138 boys    | Patella autograft, hamstring autograft  | 27 (19) | 51 | 13-18           | > 91% participated in sports at primary injury                | Age, sex, family history, associated injuries, RTS | 16.5 | Low  |
| Perkins et al. 2019 [100] USA       | Retrospective | 197 females, 157 males | Hamstring autograft                     | 50 (14) | 16 | 15.3 (10-19)    | NR                                                            | Age, sex, BMI, associated injuries                 | 2    | Low  |
| Ranade et al. 2018 [101] USA        | Retrospective | 83 (sex NR)            | Hamstring                               | 11 (13) | 32 | 12.3 (6.3-15.9) | NR                                                            | Age                                                | 4    | High |
| Rauck et al. 2021 [102] USA         | Retrospective | 38 females, 15 males   | Patella                                 | 4 (8)   | 15 | 16.6 (1.3)      | All high school athletes                                      | Sex                                                | 3.8  | High |
| Schmale et al. 2014 [103] USA       | Retrospective | 23 females, 6 males    | Hamstring autograft, tibialis allograft | 4 (14)  | 39 | 14 (1.0)        | Tegner score: 8 at primary injury                             | Sex                                                | 4    | High |
| Wall et al. 2017 [104] USA          | Retrospective | 4 girls, 23 boys       | Hamstring                               | 3 (11)  | 26 | 11 (8-15)       | NR                                                            | sex                                                | 3.6  | Low  |
| Webster et al. 2021 [105] Australia | Prospective   | 56 females, 73 males   | Patella, quadriceps, hamstring          | 20 (16) | 29 | 17 (1.9)        | 91% participated in cutting and pivoting sports               | Sex                                                | 3.4  | Low  |

Return to sports - a risky business? A systematic review with meta-analysis of risk factors for graft rupture following ACL reconstruction, Sports Medicine, Anna Cronström; anna.cronstrom@umu.se, Eva Tengman, Charlotte Häger, Umeå University

USA = United States of America, RoB = risk of bias, NR = not reported, RTS = return to sport, KOOS = Knee injury and Osteoarthritis Outcome Score, LARS = Ligament Advanced Reinforcement System, BMI = Body Mass Index, NFL = National Football League, IKDC = International Knee Documentation Committee subjective knee form, RoB = risk of bias

1. Akhtar MA, Bhattacharya R, Keating JF: **Generalised ligamentous laxity and revision ACL surgery: Is there a relation?** *Knee* 2016, **23**(6):1148-1153.
2. Akada T, Yamaura I, Gupta A, Sakai H, Takahashi K, Tsuchiya A: **Partial meniscectomy adversely affects return-to-sport outcome after anatomical double-bundle anterior cruciate ligament reconstruction.** *Knee Surg Sports Traumatol Arthrosc* 2019, **27**(3):912-920.
3. Allen MM, Pareek A, Krych AJ, Hewett TE, Levy BA, Stuart MJ, Dahm DL: **Are Female Soccer Players at an Increased Risk of Second Anterior Cruciate Ligament Injury Compared With Their Athletic Peers?** *Am J Sports Med* 2016, **44**(10):2492-2498.
4. Annear PT, Rohr EJ, Hille DM, Gohil S, Ebert JR: **No clinical difference in 10-year outcomes between standard and minimal graft debridement techniques in patients undergoing anterior cruciate ligament reconstruction using autologous hamstrings: a randomized controlled trial.** *Knee Surg Sports Traumatol Arthrosc* 2019, **27**(2):516-523.
5. Barrett AM, Craft JA, Replogle WH, Hydrick JM, Barrett GR: **Anterior cruciate ligament graft failure: a comparison of graft type based on age and Tegner activity level.** *Am J Sports Med* 2011, **39**(10):2194-2198.
6. Beischer S, Gustavsson L, Senorski EH, Karlsson J, Thomeé C, Samuelsson K, Thomeé R: **Young Athletes Who Return to Sport Before 9 Months After Anterior Cruciate Ligament Reconstruction Have a Rate of New Injury 7 Times That of Those Who Delay Return.** *J Orthop Sports Phys Ther* 2020, **50**(2):83-90.
7. Benner RW, Shelbourne KD, Gray T: **The Degree of Knee Extension Does Not Affect Postoperative Stability or Subsequent Graft Tear Rate After Anterior Cruciate Ligament Reconstruction With Patellar Tendon Autograft.** *Am J Sports Med* 2016, **44**(4):844-849.
8. Bodkin SG, Hertel J, Diduch DR, Saliba SA, Novicoff WM, Brockmeier SF, Miller MD, Gwathmey FW, Werner BC, Hart JM: **Predicting ACL Reinjury from Return to Activity Assessments at 6-months Post-Surgery: A Prospective Cohort Study.** *J Athl Train* 2021.
9. Bourke HE, Salmon LJ, Waller A, Patterson V, Pinczewski LA: **Survival of the anterior cruciate ligament graft and the contralateral ACL at a minimum of 15 years.** *Am J Sports Med* 2012, **40**(9):1985-1992.
10. Christensen JJ, Krych AJ, Engasser WM, Vanhees MK, Collins MS, Dahm DL: **Lateral Tibial Posterior Slope Is Increased in Patients With Early Graft Failure After Anterior Cruciate Ligament Reconstruction.** *Am J Sports Med* 2015, **43**(10):2510-2514.
11. Cooper DE, Dunn WR, Huston LJ, Haas AK, Spindler KP, Allen CR, Anderson AF, DeBerardino TM, Lantz BBA, Mann B *et al*: **Physiologic Preoperative Knee Hyperextension Is a Predictor of Failure in an Anterior Cruciate Ligament Revision Cohort: A Report From the MARS Group.** *Am J Sports Med* 2018, **46**(12):2836-2841.

12. Csapo R, Runer A, Hoser C, Fink C: **Contralateral ACL tears strongly contribute to high rates of secondary ACL injuries in professional ski racers.** *Knee Surg Sports Traumatol Arthrosc* 2021, **29**(6):1805-1812.
13. Digiacoio JE, Palmieri-Smith RM, Redman JA, III, Lepley LK: **Examination of Knee Morphology After Secondary Ipsilateral ACL Injury Compared With Those That Have Not Been Reinjured: A Preliminary Study.** *J Sport Rehabil* 2018, **27**(1):73-82.
14. Everhart JS, DiBartola AC, Swank K, Pettit R, Hughes L, Lewis C, Flanigan DC: **Cartilage damage at the time of anterior cruciate ligament reconstruction is associated with weaker quadriceps function and lower risk of future ACL injury.** *Knee Surg Sports Traumatol Arthrosc* 2020, **28**(2):576-583.
15. Fleming BC, Fadale PD, Hulstyn MJ, Shalvoy RM, Oksendahl HL, Badger GJ, Tung GA: **The effect of initial graft tension after anterior cruciate ligament reconstruction: a randomized clinical trial with 36-month follow-up.** *Am J Sports Med* 2013, **41**(1):25-34.
16. Fältstrom A, Hagglund M, Magnusson H, Forssblad M, Kvist J: **Predictors for additional anterior cruciate ligament reconstruction: data from the Swedish national ACL register.** *Knee Surg Sports Traumatol Arthrosc* 2016, **24**(3):885-894.
17. Fältström A, Häggglund M, Hedevik H, Kvist J: **Poor Validity of Functional Performance Tests to Predict Knee Injury in Female Soccer Players With or Without Anterior Cruciate Ligament Reconstruction.** *Am J Sports Med* 2021, **49**(6):1441-1450.
18. Gifstad T, Foss OA, Engebretsen L, Lind M, Forssblad M, Albrektsen G, Drogset JO: **Lower risk of revision with patellar tendon autografts compared with hamstring autografts: a registry study based on 45,998 primary ACL reconstructions in Scandinavia.** *Am J Sports Med* 2014, **42**(10):2319-2328.
19. Goshima K, Kitaoka K, Nakase J, Tsuchiya H: **Familial predisposition to anterior cruciate ligament injury.** *Asia-Pacific Journal of Sports Medicine, Arthroscopy, Rehabilitation and Technology* 2014, **1**(2):62-66.
20. Grassi A, Macchiarola L, Lucidi GA, Stefanelli F, Neri M, Silvestri A, Della Villa F, Zaffagnini S: **More Than a 2-Fold Risk of Contralateral Anterior Cruciate Ligament Injuries Compared With Ipsilateral Graft Failure 10 Years After Primary Reconstruction.** *Am J Sports Med* 2020:363546519893711.
21. Grassi A, Signorelli C, Urrizola F, Macchiarola L, Raggi F, Mosca M, Samuelsson K, Zaffagnini S: **Patients With Failed Anterior Cruciate Ligament Reconstruction Have an Increased Posterior Lateral Tibial Plateau Slope: A Case-Controlled Study.** *Arthroscopy* 2019, **35**(4):1172-1182.
22. Gupta R, Singhal A, Malhotra A, Soni A, Masih GD, Raghav M: **Predictors for Anterior Cruciate Ligament (ACL) Re-injury after Successful Primary ACL Reconstruction (ACLR).** *Malays Orthop J* 2020, **14**(3):50-56.
23. Henle P, Bieri KS, Brand M, Aghayev E, Bettfuehr J, Haeberli J, Kess M, Eggli S: **Patient and surgical characteristics that affect revision risk in dynamic intraligamentary stabilization of the anterior cruciate ligament.** *Knee Surg Sports Traumatol Arthrosc* 2018, **26**(4):1182-1189.
24. Henle P, Bieri KS, Haeberli J, Arnout N, Victor J, Herbort M, Koesters C, Eggli S: **Surgeon experience with dynamic intraligamentary stabilization does not influence risk of failure.** *Knee Surg Sports Traumatol Arthrosc* 2018, **26**(10):2978-2985.
25. Ifran NN, Mok YR, Krishna L: **Tear Rates of the Ipsilateral ACL Graft and the Contralateral Native ACL Are Similar following ACL Reconstruction.** *J Knee Surg* 2020.
26. Jaecker V, Drouven S, Naendrup JH, Kanakamedala AC, Pfeiffer T, Shafizadeh S: **Increased medial and lateral tibial posterior slopes are independent risk factors for graft failure following ACL reconstruction.** *Arch Orthop Trauma Surg* 2018, **138**(10):1423-1431.



27. Kaeding CC, Pedroza AD, Reinke EK, Huston LJ, Hewett TE, Flanigan DC, Spindler KP: **Change in Anterior Cruciate Ligament Graft Choice and Outcomes Over Time.** *Arthroscopy* 2017, **33**(11):2007-2014.
28. Kajetanek C, Rousseau R, Makridis K, Sanchez M, Dehlin C, Djian P: **Influence of the tibial slope on recurrent ACL ruptures.** *Journal de Traumatologie du Sport* 2017, **34**(1):37-43.
29. Kamien PM, Hydrick JM, Replogle WH, Go LT, Barrett GR: **Age, graft size, and Tegner activity level as predictors of failure in anterior cruciate ligament reconstruction with hamstring autograft.** *Am J Sports Med* 2013, **41**(8):1808-1812.
30. Kim SH, Park YB, Kim DH, Pujol N, Lee HJ: **Predictive factors for failure of anterior cruciate ligament reconstruction via the trans-tibial technique.** *Arch Orthop Trauma Surg* 2020, **140**(10):1445-1457.
31. King E, Richter C, Jackson M, Franklyn-Miller A, Falvey E, Myer GD, Strike S, Withers D, Moran R: **Factors Influencing Return to Play and Second Anterior Cruciate Ligament Injury Rates in Level 1 Athletes After Primary Anterior Cruciate Ligament Reconstruction: 2-Year Follow-up on 1432 Reconstructions at a Single Center.** *Am J Sports Med* 2020, **48**(4):812-824.
32. King E, Richter C, Daniels KAJ, Franklyn-Miller A, Falvey E, Myer GD, Jackson M, Moran R, Strike S: **Biomechanical but Not Strength or Performance Measures Differentiate Male Athletes Who Experience ACL Reinjury on Return to Level 1 Sports.** *Am J Sports Med* 2021, **49**(4):918-927.
33. Krismer AM, Gousopoulos L, Kohl S, Ateschrang A, Kohlhof H, Ahmad SS: **Factors influencing the success of anterior cruciate ligament repair with dynamic intraligamentary stabilisation.** *Knee Surg Sports Traumatol Arthrosc* 2017, **25**(12):3923-3928.
34. Krosshaug T, Steffen K, Kristianslund E, Nilstad A, Mok KM, Myklebust G, Andersen TE, Holme I, Engebretsen L, Bahr R: **The Vertical Drop Jump Is a Poor Screening Test for ACL Injuries in Female Elite Soccer and Handball Players: A Prospective Cohort Study of 710 Athletes.** *Am J Sports Med* 2016, **44**(4):874-883.
35. Kyritsis P, Bahr R, Landreau P, Miladi R, Witvrouw E: **Likelihood of ACL graft rupture: not meeting six clinical discharge criteria before return to sport is associated with a four times greater risk of rupture.** *Br J Sports Med* 2016, **50**(15):946-951.
36. Laboute E, Savalli L, Puig P, Trouve P, Sabot G, Monnier G, Dubroca B: **Analysis of return to competition and repeat rupture for 298 anterior cruciate ligament reconstructions with patellar or hamstring tendon autograft in sportspeople.** *Ann Phys Rehabil Med* 2010, **53**(10):598-614.
37. Larson CM, Bedi A, Dietrich ME, Swaringen JC, Wulf CA, Rowley DM, Giveans MR: **Generalized Hypermobility, Knee Hyperextension, and Outcomes After Anterior Cruciate Ligament Reconstruction: Prospective, Case-Control Study With Mean 6 Years Follow-up.** *Arthroscopy* 2017, **33**(10):1852-1858.
38. Lee DW, Lee JK, Kwon SH, Moon SG, Cho SI, Chung SH, Kim JG: **Adolescents show a lower healing rate of anterolateral ligament injury and a higher rotational laxity than adults after anterior cruciate ligament reconstruction.** *Knee* 2021, **30**:113-124.
39. Leys T, Salmon L, Waller A, Linklater J, Pinczewski L: **Clinical results and risk factors for reinjury 15 years after anterior cruciate ligament reconstruction: a prospective study of hamstring and patellar tendon grafts.** *Am J Sports Med* 2012, **40**(3):595-605.
40. Lord L, Cristiani R, Edman G, Forssblad M, Stålmán A: **One sixth of primary anterior cruciate ligament reconstructions may undergo reoperation due to complications or new injuries within 2 years.** *Knee Surg Sports Traumatol Arthrosc* 2020, **28**(8):2478-2485.
41. Magnussen RA, Lawrence JT, West RL, Toth AP, Taylor DC, Garrett WE: **Graft size and patient age are predictors of early revision after anterior cruciate ligament reconstruction with hamstring autograft.** *Arthroscopy* 2012, **28**(4):526-531.

42. Maletis GB, Inacio MC, Funahashi TT: **Risk factors associated with revision and contralateral anterior cruciate ligament reconstructions in the Kaiser Permanente ACLR registry.** *Am J Sports Med* 2015, **43**(3):641-647.
43. Mardani-Kivi M, Mobarakeh MK, Keyhani S, Ebrahim-Zadeh MH, Azari Z: **Contralateral and siblings' knees are at higher risk of ACL tear for patients with a positive history of ACL tear.** *Knee Surg Sports Traumatol Arthrosc* 2019.
44. McPherson AL, Feller JA, Hewett TE, Webster KE: **Psychological Readiness to Return to Sport Is Associated With Second Anterior Cruciate Ligament Injuries.** *Am J Sports Med* 2019, **47**(4):857-862.
45. Mohtadi N, Chan D, Barber R, Paolucci EO: **Reruptures, Reinjuries, and Revisions at a Minimum 2-Year Follow-up: A Randomized Clinical Trial Comparing 3 Graft Types for ACL Reconstruction.** *Clin J Sport Med* 2016, **26**(2):96-107.
46. Okoroha KR, Fidai MS, Tramer JS, Elmenini J, Makhni EC, Verma NN, Bach BR, Moutzouros V: **Length of Time Between Anterior Cruciate Ligament Reconstruction and Return to Sport Does Not Predict Need for Revision Surgery in National Football League Players.** *Arthroscopy* 2019, **35**(1):158-162.
47. Paterno MV, Rauh MJ, Schmitt LC, Ford KR, Hewett TE: **Incidence of contralateral and ipsilateral anterior cruciate ligament (ACL) injury after primary ACL reconstruction and return to sport.** *Clin J Sport Med* 2012, **22**(2):116-121.
48. Pfeiffer TR, Burnham JM, Hughes JD, Kanakamedala AC, Herbst E, Popchak A, Shafizadeh S, Irrgang JJ, Debski RE, Musahl V: **An Increased Lateral Femoral Condyle Ratio Is a Risk Factor for Anterior Cruciate Ligament Injury.** *J Bone Joint Surg Am* 2018, **100**(10):857-864.
49. Pinczewski LA, Lyman J, Salmon LJ, Russell VJ, Roe J, Linklater J: **A 10-year comparison of anterior cruciate ligament reconstructions with hamstring tendon and patellar tendon autograft: a controlled, prospective trial.** *Am J Sports Med* 2007, **35**(4):564-574.
50. Poston GR, Schmitt LC, Ithurburn MP, Hugentobler JA, Thomas S, Paterno MV: **Reduced 2-D Frontal Plane Motion During Single-Limb Landing Is Associated With Risk of Future Anterior Cruciate Ligament Graft Rupture After Anterior Cruciate Ligament Reconstruction and Return to Sport: A Pilot Study.** *J Orthop Sports Phys Ther* 2021, **51**(2):82-87.
51. Rahardja R, Zhu M, Love H, Clatworthy MG, Monk AP, Young SW: **Rates of revision and surgeon-reported graft rupture following ACL reconstruction: early results from the New Zealand ACL Registry.** *Knee Surg Sports Traumatol Arthrosc* 2020, **28**(7):2194-2202.
52. Riff AJ, Luchetti TJ, Weber AE, Chahal J, Bach BR, Jr.: **Thirty-Year Experience With ACL Reconstruction Using Patellar Tendon: A Critical Evaluation of Revision and Reoperation.** *Orthop J Sports Med* 2017, **5**(8):2325967117724345.
53. Rosenstiel N, Praz C, Ouanezar H, Saithna A, Fournier Y, Hager JP, Thauinat M, Sonnery-Cottet B: **Combined Anterior Cruciate and Anterolateral Ligament Reconstruction in the Professional Athlete: Clinical Outcomes From the Scientific Anterior Cruciate Ligament Network International Study Group in a Series of 70 Patients With a Minimum Follow-Up of 2 Years.** *Arthroscopy* 2019, **35**(3):885-892.
54. Runer A, Csapo R, Hepperger C, Herbort M, Hoser C, Fink C: **Anterior Cruciate Ligament Reconstructions With Quadriceps Tendon Autograft Result in Lower Graft Rupture Rates but Similar Patient-Reported Outcomes as Compared With Hamstring Tendon Autograft: A Comparison of 875 Patients.** *Am J Sports Med* 2020, **48**(9):2195-2204.
55. Salmon L, Russell V, Musgrove T, Pinczewski L, Refshauge K: **Incidence and risk factors for graft rupture and contralateral rupture after anterior cruciate ligament reconstruction.** *Arthroscopy* 2005, **21**(8):948-957.
56. Salmon LJ, Russell VJ, Refshauge K, Kader D, Connolly C, Linklater J, Pinczewski LA: **Long-term outcome of endoscopic anterior cruciate ligament reconstruction with patellar tendon autograft: minimum 13-year review.** *Am J Sports Med* 2006, **34**(5):721-732.

57. Salmon LJ, Heath E, Akrawi H, Roe JP, Linklater J, Pinczewski LA: **20-Year Outcomes of Anterior Cruciate Ligament Reconstruction With Hamstring Tendon Autograft: The Catastrophic Effect of Age and Posterior Tibial Slope.** *Am J Sports Med* 2018, **46**(3):531-543.
58. Sanders TL, Pareek A, Hewett TE, Levy BA, Dahm DL, Stuart MJ, Krych AJ: **Long-term rate of graft failure after ACL reconstruction: a geographic population cohort analysis.** *Knee Surg Sports Traumatol Arthrosc* 2017, **25**(1):222-228.
59. Sandon A, Engström B, Forssblad M: **High Risk of Further Anterior Cruciate Ligament Injury in a 10-Year Follow-up Study of Anterior Cruciate Ligament-Reconstructed Soccer Players in the Swedish National Knee Ligament Registry.** *Arthroscopy* 2020, **36**(1):189-195.
60. Sauer S, English R, Clatworthy M: **The influence of tibial slope on anterior cruciate ligament graft failure risk is dependent on graft positioning.** *J Orthop Surg (Hong Kong)* 2019, **27**(1):2309499019834674.
61. Schlumberger M, Schuster P, Schulz M, Immendörfer M, Mayer P, Bartholomä J, Richter J: **Traumatic graft rupture after primary and revision anterior cruciate ligament reconstruction: retrospective analysis of incidence and risk factors in 2915 cases.** *Knee Surg Sports Traumatol Arthrosc* 2017, **25**(5):1535-1541.
62. Shelbourne KD, Gray T, Haro M: **Incidence of subsequent injury to either knee within 5 years after anterior cruciate ligament reconstruction with patellar tendon autograft.** *Am J Sports Med* 2009, **37**(2):246-251.
63. Singhal MC, Gardiner JR, Johnson DL: **Failure of primary anterior cruciate ligament surgery using anterior tibialis allograft.** *Arthroscopy* 2007, **23**(5):469-475.
64. Sousa PL, Krych AJ, Cates RA, Levy BA, Stuart MJ, Dahm DL: **Return to sport: Does excellent 6-month strength and function following ACL reconstruction predict midterm outcomes?** *Knee Surg Sports Traumatol Arthrosc* 2017, **25**(5):1356-1363.
65. Su AW, Bogunovic L, Smith MV, Gortz S, Brophy RH, Wright RW, Matava MJ: **Medial Tibial Slope Determined by Plain Radiography Is Not Associated with Primary or Recurrent Anterior Cruciate Ligament Tears.** *J Knee Surg* 2020, **33**(1):22-28.
66. Tagesson S, Kvist J: **Greater fear of re-injury and increased tibial translation in patients who later sustain an ACL graft rupture or a contralateral ACL rupture: a pilot study.** *J Sports Sci* 2016, **34**(2):125-132.
67. Thompson S, Salmon L, Waller A, Linklater J, Roe J, Pinczewski L: **Twenty-year outcomes of a longitudinal prospective evaluation of isolated endoscopic anterior cruciate ligament reconstruction with patellar tendon autografts.** *Am J Sports Med* 2015, **43**(9):2164-2174.
68. van Eck CF, Schkrohowsky JG, Working ZM, Irrgang JJ, Fu FH: **Prospective analysis of failure rate and predictors of failure after anatomic anterior cruciate ligament reconstruction with allograft.** *Am J Sports Med* 2012, **40**(4):800-807.
69. Vincent YP-h, Yiu-chung W, Patrick YS-h: **Role of Physiotherapy in Preventing Failure of Primary Anterior Cruciate Ligament Reconstruction.** *Journal of Orthopaedics, Trauma and Rehabilitation* 2017, **22**(1):6-12.
70. Wasserstein D, Khoshbin A, Dwyer T, Chahal J, Gandhi R, Mahomed N, Ogilvie-Harris D: **Risk factors for recurrent anterior cruciate ligament reconstruction: a population study in Ontario, Canada, with 5-year follow-up.** *Am J Sports Med* 2013, **41**(9):2099-2107.
71. Webb JM, Salmon LJ, Leclerc E, Pinczewski LA, Roe JP: **Posterior tibial slope and further anterior cruciate ligament injuries in the anterior cruciate ligament-reconstructed patient.** *Am J Sports Med* 2013, **41**(12):2800-2804.
72. Welling W, Benjaminse A, Lemmink K, Gokeler A: **Passing return to sports tests after ACL reconstruction is associated with greater likelihood for return to sport but fail to identify second injury risk.** *Knee* 2020, **27**(3):949-957.
73. Webster KE, Feller JA, Leigh WB, Richmond AK: **Younger patients are at increased risk for graft rupture and contralateral injury after anterior cruciate ligament reconstruction.** *Am J Sports Med* 2014, **42**(3):641-647.

74. Webster KE, Feller JA: **Clinical Tests Can Be Used to Screen for Second Anterior Cruciate Ligament Injury in Younger Patients Who Return to Sport.** *Orthop J Sports Med* 2019, **7**(8):2325967119863003.
75. Webster KE, Murgier J, Feller JA, Klemm HJ, Devitt BM, Whitehead TS: **Preservation of the Tibial Stump During Anterior Cruciate Ligament Reconstruction Surgery Did Not Increase the Rate of Surgery for Symptomatic Cyclops Lesions.** *Orthop J Sports Med* 2021, **9**(4):2325967121992517.
76. Wright RW, Dunn WR, Amendola A, Andrish JT, Bergfeld J, Kaeding CC, Marx RG, McCarty EC, Parker RD, Wolcott M *et al*: **Risk of tearing the intact anterior cruciate ligament in the contralateral knee and rupturing the anterior cruciate ligament graft during the first 2 years after anterior cruciate ligament reconstruction: a prospective MOON cohort study.** *Am J Sports Med* 2007, **35**(7):1131-1134.
77. Yabroudi MA, Björnsson H, Lynch AD, Muller B, Samuelsson K, Tarabichi M, Karlsson J, Fu FH, Harner CD, Irrgang JJ: **Predictors of Revision Surgery After Primary Anterior Cruciate Ligament Reconstruction.** *Orthop J Sports Med* 2016, **4**(9):2325967116666039.
78. Borton ZM, Yasen SK, Mumith A, Wilson AJ: **Mid-bundle positioning of the femoral socket increases graft rupture in anatomic single bundle anterior cruciate ligament reconstruction.** *Knee* 2018, **25**(6):1122-1128.
79. Filbay SR, Roos EM, Frobell RB, Roemer F, Ranstam J, Lohmander LS: **Delaying ACL reconstruction and treating with exercise therapy alone may alter prognostic factors for 5-year outcome: an exploratory analysis of the KANON trial.** *Br J Sports Med* 2017, **51**(22):1622-1629.
80. Lee CC, Youm YS, Cho SD, Jung SH, Bae MH, Park SJ, Kim HW: **Does Posterior Tibial Slope Affect Graft Rupture Following Anterior Cruciate Ligament Reconstruction?** *Arthroscopy* 2018, **34**(7):2152-2155.
81. Lee BH, Jangir R, Kim HY, Shin JM, Chang M, Kim K, Wang JH: **Comparison of anterior cruciate ligament volume after anatomic double-bundle anterior cruciate ligament reconstruction.** *Knee* 2017, **24**(3):580-587.
82. Pullen WM, Bryant B, Gaskill T, Sicignano N, Evans AM, DeMaio M: **Predictors of Revision Surgery After Anterior Cruciate Ligament Reconstruction.** *Am J Sports Med* 2016, **44**(12):3140-3145.
83. Shelbourne KD, Davis TJ, Klootwyk TE: **The relationship between intercondylar notch width of the femur and the incidence of anterior cruciate ligament tears. A prospective study.** *Am J Sports Med* 1998, **26**(3):402-408.
84. Tulloch SJ, Devitt BM, Porter T, Hartwig T, Klemm H, Hookway S, Norsworthy CJ: **Primary ACL reconstruction using the LARS device is associated with a high failure rate at minimum of 6-year follow-up.** *Knee Surg Sports Traumatol Arthrosc* 2019, **27**(11):3626-3632.
85. Bayomy AF, Bompadre V, Schmale GA: **The Impact of Transphyseal Anterior Cruciate Ligament Reconstruction on Lower Extremity Growth and Alignment.** *Arthroscopy* 2019, **35**(3):940-949.
86. Bram JT, Pascual-Leone N, Patel NM, DeFrancesco CJ, Talathi NS, Ganley TJ: **Do Pediatric Patients With Anterior Cruciate Ligament Tears Have a Higher Rate of Familial Anterior Cruciate Ligament Injury?** *Orthop J Sports Med* 2020, **8**(10):2325967120959665.
87. Britt E, Ouillette R, Edmonds E, Chambers H, Johnson K, Bastrom T, Pennock A: **The Challenges of Treating Female Soccer Players With ACL Injuries: Hamstring Versus Bone-Patellar Tendon-Bone Autograft.** *Orthop J Sports Med* 2020, **8**(11):2325967120964884.
88. Cruz AI, Jr., Fabricant PD, McGraw M, Rozell JC, Ganley TJ, Wells L: **All-Epiphyseal ACL Reconstruction in Children: Review of Safety and Early Complications.** *J Pediatr Orthop* 2017, **37**(3):204-209.

89. Ellis HB, Matheny LM, Briggs KK, Pennock AT, Steadman JR: **Outcomes and revision rate after bone-patellar tendon-bone allograft versus autograft anterior cruciate ligament reconstruction in patients aged 18 years or younger with closed physes.** *Arthroscopy* 2012, **28**(12):1819-1825.
90. Engelman GH, Carry PM, Hitt KG, Polousky JD, Vidal AF: **Comparison of allograft versus autograft anterior cruciate ligament reconstruction graft survival in an active adolescent cohort.** *Am J Sports Med* 2014, **42**(10):2311-2318.
91. Fones L, Kostyun RO, Cohen AD, Pace JL: **Patient-Reported Outcomes, Return-to-Sport Status, and Reinjury Rates After Anterior Cruciate Ligament Reconstruction in Adolescent Athletes: Minimum 2-Year Follow-up.** *Orthop J Sports Med* 2020, **8**(11):2325967120964471.
92. Ghosh K, Salmon LJ, Heath E, Pinczewski LA, Roe JP: **Transphyseal anterior cruciate ligament reconstruction using living parental donor hamstring graft: excellent clinical results at 2 years in a cohort of 100 patients.** *Knee Surg Sports Traumatol Arthrosc* 2020, **28**(8):2511-2518.
93. Grassi A, Pizza N, Zambon Bertoja J, Macchiarola L, Lucidi GA, Dal Fabbro G, Zaffagnini S: **Higher risk of contralateral anterior cruciate ligament (ACL) injury within 2 years after ACL reconstruction in under-18-year-old patients with steep tibial plateau slope.** *Knee Surg Sports Traumatol Arthrosc* 2021, **29**(6):1690-1700.
94. Graziano J, Chiaia T, de Mille P, Nawabi DH, Green DW, Cordasco FA: **Return to Sport for Skeletally Immature Athletes After ACL Reconstruction: Preventing a Second Injury Using a Quality of Movement Assessment and Quantitative Measures to Address Modifiable Risk Factors.** *Orthop J Sports Med* 2017, **5**(4):2325967117700599.
95. Heath EL, Salmon LJ, Cooper R, Pappas E, Roe JP, Pinczewski LA: **5-Year Survival of Pediatric Anterior Cruciate Ligament Reconstruction With Living Donor Hamstring Tendon Grafts.** *Am J Sports Med* 2019, **47**(1):41-51.
96. Ho B, Edmonds EW, Chambers HG, Bastrom TP, Pennock AT: **Risk Factors for Early ACL Reconstruction Failure in Pediatric and Adolescent Patients: A Review of 561 Cases.** *J Pediatr Orthop* 2018, **38**(7):388-392.
97. Larson CM, Heikes CS, Ellingson CI, Wulf CA, Giveans MR, Stone RM, Bedi A: **Allograft and Autograft Transphyseal Anterior Cruciate Ligament Reconstruction in Skeletally Immature Patients: Outcomes and Complications.** *Arthroscopy* 2016, **32**(5):860-867.
98. Mitchell BC, Siow MY, Bastrom T, Bomar JD, Pennock AT, Parvaresh K, Edmonds EW: **Predictive Value of the Magnetic Resonance Imaging-Based Coronal Lateral Collateral Ligament Sign on Adolescent Anterior Cruciate Ligament Reconstruction Graft Failure.** *Am J Sports Med* 2021, **49**(4):935-940.
99. Morgan MD, Salmon LJ, Waller A, Roe JP, Pinczewski LA: **Fifteen-Year Survival of Endoscopic Anterior Cruciate Ligament Reconstruction in Patients Aged 18 Years and Younger.** *Am J Sports Med* 2016, **44**(2):384-392.
100. Perkins CA, Busch MT, Christino M, Herzog MM, Willimon SC: **Allograft Augmentation of Hamstring Anterior Cruciate Ligament Autografts Is Associated With Increased Graft Failure in Children and Adolescents.** *Am J Sports Med* 2019, **47**(7):1576-1582.
101. Ranade SC, Refakis CA, Cruz AI, Jr., Leddy KL, Wells L, Lawrence JT, Ganley TJ: **Validated Pediatric Functional Outcomes of All-epiphyseal ACL Reconstructions: Does Reinjury Affect Outcomes?** *J Pediatr Orthop* 2020, **40**(4):157-161.
102. Rauck RC, Apostolokos JM, Nwachukwu BU, Schneider BL, Williams RJ, 3rd, Dines JS, Altchek DW, Pearle A, Allen A, Stein BS *et al*: **Return to Sport After Bone-Patellar Tendon-Bone Autograft ACL Reconstruction in High School-Aged Athletes.** *Orthop J Sports Med* 2021, **9**(6):23259671211011510.

Return to sports - a risky business? A systematic review with meta-analysis of risk factors for graft rupture following ACL reconstruction, Sports Medicine, Anna Cronström; anna.cronstrom@umu.se, Eva Tengman, Charlotte Häger, Umeå University

103. Schmale GA, Kweon C, Larson RV, Bompadre V: **High satisfaction yet decreased activity 4 years after transphyseal ACL reconstruction.** *Clin Orthop Relat Res* 2014, **472**(7):2168-2174.
104. Wall EJ, Ghattas PJ, Eismann EA, Myer GD, Carr P: **Outcomes and Complications After All-Epiphyseal Anterior Cruciate Ligament Reconstruction in Skeletally Immature Patients.** *Orthop J Sports Med* 2017, **5**(3):2325967117693604.
105. Webster KE, Feller JA, Klemm HJ: **Second ACL Injury Rates in Younger Athletes Who Were Advised to Delay Return to Sport Until 12 Months After ACL Reconstruction.** *Orthop J Sports Med* 2021, **9**(2):2325967120985636.
