# Supplementary material for: Return to Sports: A Risky Business? A Systematic Review with Meta-Analysis of Risk Factors for Graft Rupture Following ACL Reconstruction
Source: PubMed Central journal article supplement (PMC9807539; doi:10.1007/s40279-022-01747-3), 2022-08-24
Supplement: 40279_2022_1747_MOESM6_ESM.pdf [file 40279_2022_1747_MOESM6_ESM.pdf]

**Online resource 6. Risk of bias for all papers included in the meta-analyses and publication bias for sex, family history, return to sport and concomitant meniscal tear as risk factors for graft rupture**

**Table 1.** Risk of bias assessment using the QUIPS tool

| Article                 | Study participation | Study attrition | Prognostic factor measurement | Outcome measurement | Study confounding | Statistical analysis | RoB      |
|-------------------------|---------------------|-----------------|-------------------------------|---------------------|-------------------|----------------------|----------|
| Ahktar et al. 2016      | High                | Low             | Low                           | Low                 | High              | Low                  | High     |
| Akada et al. 2019       | Low                 | Low             | Low                           | Low                 | High              | Low                  | High     |
| Allen et al. 2016       | Moderate            | Low             | Low                           | Low                 | Low               | Low                  | Low      |
| Annear et al. 2019      | Moderate            | Low             | Low                           | Moderate            | Moderate          | Low                  | High     |
| Barret et al. 2011      | Low                 | Moderate        | Low                           | Low                 | High              | Low                  | High     |
| Bayomy et al. 2019      | Moderate            | Low             | Low                           | Low                 | Low               | Low                  | Low      |
| Beischer et al. 2020    | Moderate            | Low             | Low                           | Low                 | Moderate          | Low                  | Moderate |
| Benner et al. 2016      | Moderate            | Low             | Low                           | Low                 | Moderate          | Low                  | Moderate |
| Bodkin et al. 2021      | Low                 | Low             | Low                           | Low                 | Low               | Low                  | Low      |
| Borton et al. 2018      | Moderate            | Low             | Low                           | Moderate            | Moderate          | Low                  | High     |
| Bourke et al. 2012      | Moderate            | Low             | Low                           | Moderate            | Low               | Low                  | Moderate |
| Bram et al. 2020        | Low                 | High            | Low                           | Moderate            | Low               | Low                  | High     |
| Britt et al. 2020       | Moderate            | Low             | Low                           | Low                 | Moderate          | Low                  | Moderate |
| Christensen et al. 2015 | Moderate            | Low             | Low                           | Low                 | Low               | Low                  | Low      |
| Cooper et al. 2018      | High                | Low             | High                          | Low                 | Low               | Low                  | High     |
| Cruz et al. 2017        | Moderate            | Low             | Low                           | Low                 | Low               | Low                  | Low      |
| Csapo et al. 2021       | Low                 | Low             | Low                           | Low                 | Moderate          | Low                  | Low      |
| Defranesco et al. 2020  | Moderate            | Low             | Low                           | Moderate            | Moderate          | Low                  | High     |
| Della Villa et al. 2021 | Low                 | Low             | Low                           | Low                 | Low               | Low                  | Low      |
| Digiacoimo et al. 2018  | Moderate            | Low             | Low                           | Low                 | Moderate          | Low                  | Moderate |
| Ellis et al. 2012       | Low                 | Low             | Low                           | Low                 | Low               | Low                  | Low      |
| Engelman et al. 2014    | Moderate            | High            | Low                           | Low                 | Low               | Low                  | High     |
| Everhart et al. 2020    | Moderate            | Low             | Low                           | Low                 | Low               | Low                  | Low      |
| Filbay et al. 2017      | Moderate            | Low             | Low                           | Low                 | Low               | Low                  | Low      |
| Fleming et al. 2013     | Moderate            | Low             | Low                           | Low                 | Moderate          | Low                  | Moderate |
| Fones et al. 2020       | Low                 | Moderate        | Low                           | Moderate            | Low               | Low                  | Moderate |
| Fältström et al. 2016   | Low                 | Moderate        | Low                           | Low                 | Low               | Low                  | Low      |
| Fältström et al. 2021   | Moderate            | Low             | Low                           | Low                 | Moderate          | Low                  | Moderate |
| Gagliardi et al. 2019   | Moderate            | Low             | Low                           | Low                 | Low               | Low                  | Low      |

Return to sports - a risky business? A systematic review with meta-analysis of risk factors for graft rupture following ACL reconstruction, Sports Medicine, Anna Cronström; anna.cronstrom@umu.se, Eva Tengman, Charlotte Häger, Umeå University

|                                |          |          |          |          |          |     |          |
|--------------------------------|----------|----------|----------|----------|----------|-----|----------|
| Gans et al. 2018               | High     | Low      | Low      | Moderate | Moderate | Low | High     |
| Ghosh et al. 2020              | Moderate | Low      | Low      | Moderate | High     | Low | High     |
| Gifstad et al. 2014            | Low      | Low      | Low      | Low      | Low      | Low | Low      |
| Goncalvez et.al 2017           | Moderate | Low      | Low      | Low      | Low      | Low | Low      |
| Goshima et a. 2014             | Moderate | Low      | Low      | Moderate | Moderate | Low | High     |
| Grassi et al. 2020             | Low      | Low      | Low      | Low      | Low      | Low | Low      |
| Grassi et al. 2021             | Moderate | Low      | Low      | Low      | Low      | Low | Low      |
| Grassi et al. 2019             | Moderate | Low      | Low      | Low      | Low      | Low | Low      |
| Graziano et al. 2017           | Moderate | Low      | Low      | Moderate | High     | Low | High     |
| Gupta et al. 2019              | Moderate | Low      | Low      | Moderate | High     | Low | High     |
| Heath et al. 2019              | Low      | Low      | Low      | Low      | Low      | Low | Low      |
| Henle et al. 2018 <sup>1</sup> | Low      | Low      | Low      | Low      | Low      | Low | Low      |
| Henle et al. 2018 <sup>2</sup> | Moderate | Low      | Low      | Low      | Low      | Low | Low      |
| Ho et al. 2018                 | Moderate | Low      | Low      | Low      | Low      | Low | Low      |
| Ifran et al. 2020              | Moderate | Low      | Low      | Low      | Low      | Low | Low      |
| Jaeger et al. 2018             | Moderate | Low      | Low      | Low      | Low      | Low | Low      |
| Kaeding et al. 2017            | Low      | Low      | Low      | Low      | Low      | Low | Low      |
| Kajetanek et al. 2017          | Low      | Low      | Moderate | Low      | Moderate | Low | Moderate |
| Kamien et al. 2013             | Moderate | Low      | Low      | Low      | High     | Low | High     |
| Kim et al. 2020                | Low      | Low      | Low      | Low      | Low      | Low | Low      |
| King et al. 2020               | Low      | Low      | Low      | Low      | Low      | Low | Low      |
| King et al. 2021               | Moderate | Low      | Moderate | Moderate | Low      | Low | High     |
| Kinsella et.al 2020            | High     | Low      | Low      | Low      | Low      | Low | High     |
| Krismer et.al 2017             | Moderate | Low      | Moderate | Low      | Low      | Low | Moderate |
| Krosshaug et al. 2016          | Low      | Low      | Low      | Low      | Low      | Low | Low      |
| Kyritsis et al. 2016           | Low      | Low      | Low      | Moderate | Low      | Low | Low      |
| Laboute et al. 2010            | Low      | Moderate | Low      | Moderate | Moderate | Low | High     |
| Lai et.al 2018                 | Moderate | Moderate | Low      | Low      | High     | Low | High     |
| Larson et al 2016              | Low      | Low      | Low      | Moderate | Low      | Low | Low      |
| Larson et al. 2017             | High     | Low      | Moderate | Low      | High     | Low | High     |
| Lee et al. 2018                | High     | Low      | Low      | Low      | Low      | Low | High     |
| Lee et al. 2017                | Moderate | Low      | Low      | Moderate | Moderate | Low | High     |
| Lee 2021                       | Low      | Low      | Low      | Low      | Low      | Low | Low      |
| Levins et al. 2016             | Moderate | High     | Low      | Low      | Low      | Low | High     |
| Leys et al. 2012               | Moderate | Low      | Low      | Moderate | Moderate | Low | High     |
| Lord et al. 2020               | Moderate | Low      | Low      | Low      | Low      | Low | Low      |
| Magnussen et al. 2012          | Low      | High     | Low      | Low      | Moderate | Low | High     |
| Magnusson et al. 2018          | Low      | Low      | Moderate | Low      | Low      | Low | Low      |
| Maletis et al. 2015            | Moderate | Low      | Low      | Low      | Low      | Low | Low      |

Return to sports - a risky business? A systematic review with meta-analysis of risk factors for graft rupture following ACL reconstruction, Sports Medicine, Anna Cronström; anna.cronstrom@umu.se, Eva Tengman, Charlotte Häger, Umeå University

|                            |          |          |          |          |          |          |          |
|----------------------------|----------|----------|----------|----------|----------|----------|----------|
| Mardani-Kivi et al. 2019   | Low      | Moderate | Low      | Moderate | High     | Low      | High     |
| McPherson et al. 2019      | Low      | Low      | Low      | Low      | Moderate | Low      | Low      |
| Mitchell et al. 2021       | Moderate | Low      | Low      | Low      | Low      | Low      | Low      |
| Mohtadi et al. 2016        | Low      | Low      | Low      | Low      | Low      | Low      | Low      |
| Morgan et al. 2016         | Low      | Low      | Low      | Moderate | Low      | Low      | Low      |
| Okorooha et al. 2019       | Low      | Low      | Low      | Low      | Low      | Low      | Low      |
| Patel et al. 2019          | Low      | Low      | Low      | Low      | Low      | Low      | Low      |
| Paterno et al. 2012        | Moderate | Low      | Low      | Low      | Moderate | Low      | Moderate |
| Paterno et al. 2018        | High     | Low      | Low      | Moderate | High     | Low      | High     |
| Perkins et al. 2019        | Moderate | Low      | Low      | Low      | Low      | Low      | Low      |
| Pfeiffer et al. 2018       | Moderate | Low      | Low      | Low      | Moderate | Low      | Moderate |
| Pinczewski et al. 2007     | Moderate | Low      | Moderate | Moderate | Moderate | Low      | High     |
| Poston et al. 2020         | Moderate | Low      | Low      | Low      | Low      | Low      | Low      |
| Pullen et al. 2016         | Low      | Low      | Low      | Low      | Low      | Low      | Low      |
| Rahardja et al. 2020       | Moderate | Low      | Low      | Low      | Low      | Low      | Low      |
| Ranade et al. 2018         | High     | Low      | Low      | Moderate | Moderate | Low      | High     |
| Rauck et al. 2021          | Low      | High     | Moderate | Low      | Low      | Low      | High     |
| Riff et al. 2017           | Moderate | Low      | Low      | Low      | High     | Low      | High     |
| Rosenstiel et al. 2019     | Low      | Low      | Low      | Low      | Low      | Low      | Low      |
| Runer et al. 2020          | Low      | Low      | Low      | Moderate | Low      | Low      | Low      |
| Salmon et al. 2005         | Low      | Low      | Low      | Low      | Low      | Low      | Low      |
| Salmon et al. 2006         | Low      | Low      | Low      | Low      | Low      | Low      | Low      |
| Salmon et al. 2018         | Moderate | Low      | Low      | Low      | Low      | Low      | Low      |
| Sanders et al. 2017        | Moderate | Low      | Low      | Low      | Low      | Low      | Low      |
| Sandon et al. 2020         | Low      | High     | Low      | Moderate | High     | Low      | High     |
| Sauer et al. 2019          | Moderate | Low      | Low      | Low      | Low      | Low      | Low      |
| Schlumberger et al. 2017   | Moderate | Low      | Low      | Low      | Moderate | Low      | Moderate |
| Schmale et al. 2014        | Low      | High     | Low      | Low      | High     | Low      | High     |
| Shelbourne et al. 2009     | Low      | Moderate | Low      | Moderate | High     | Low      | High     |
| Shelbourne et al. 1998     | Low      | Low      | Low      | Moderate | Moderate | Low      | Moderate |
| Singhal et al. 2007        | Moderate | High     | Low      | Low      | High     | Moderate | High     |
| Sonnery-Cottet et al. 2017 | Low      | Low      | Low      | Low      | Low      | Low      | Low      |
| Sousa et al. 2017          | Low      | Low      | Low      | Low      | Low      | Low      | Low      |
| Su et al. 2020             | High     | Low      | Low      | Low      | Low      | Low      | High     |
| Tagesson et al. 2016       | Moderate | Low      | Low      | Low      | Moderate | Low      | Moderate |
| Thompson et al. 2015       | Moderate | Low      | Low      | Low      | Low      | Low      | Low      |

Return to sports - a risky business? A systematic review with meta-analysis of risk factors for graft rupture following ACL reconstruction, Sports Medicine, Anna Cronström; anna.cronstrom@umu.se, Eva Tengman, Charlotte Häger, Umeå University

|                         |          |          |          |          |          |     |          |
|-------------------------|----------|----------|----------|----------|----------|-----|----------|
| Tulloch et al. 2019     | Low      | Low      | Low      | Low      | Low      | Low | Low      |
| Van Eck et al. 2012     | Moderate | Low      | Low      | Low      | Low      | Low | Low      |
| Vincent et al. 2017     | Moderate | Low      | Low      | Low      | Low      | Low | Low      |
| Wall et al. 2017        | Moderate | Moderate | Low      | Low      | Low      | Low | Moderate |
| Wasserstein et al. 2013 | Moderate | Low      | Low      | Low      | Low      | Low | Low      |
| Webb et al. 2013        | High     | Low      | Low      | Low      | Low      | Low | High     |
| Welling et al. 2020     | Moderate | Low      | Low      | Moderate | Moderate | Low | High     |
| Webster et al. 2014     | Moderate | Low      | Low      | Low      | Moderate | Low | Moderate |
| Webster et al. 2019     | Moderate | Low      | Moderate | Moderate | Moderate | Low | High     |
| Webster et al. 2021     | Low      | Low      | Low      | Low      | High     | Low | High     |
| Webster et a. 2021      | Low      | Low      | Low      | Moderate | Low      | Low | Low      |
| Wright et al. 2007      | Moderate | Low      | Low      | Low      | High     | Low | High     |
| Yabroudi et al. 2016    | Moderate | High     | Low      | Low      | Low      | Low | High     |

RoB = risk of bias, Low RoB = all domains are rated as low or at most one rated as moderate, moderate Rob = 4 domains are rated as low and two domains are rated as moderate RoB, high RoB = at least 3 domains are rated as moderate or at least 1 domain rated as high RoB.

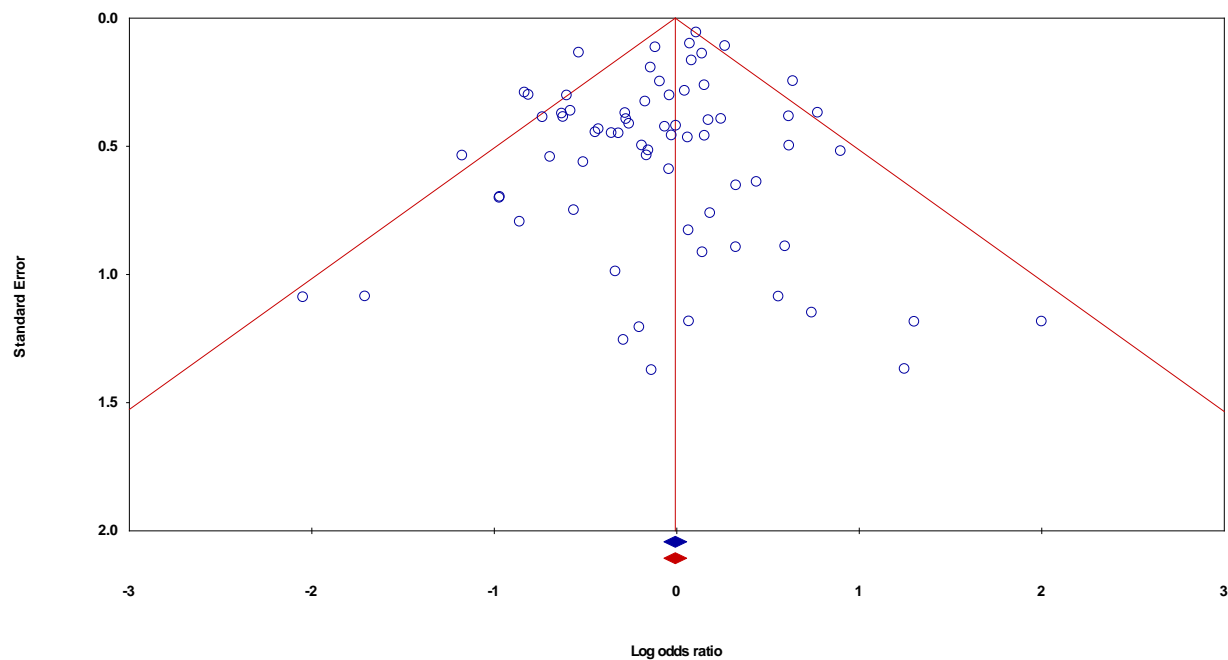

**Fig 1.** Funnel plot with trim and fill imputations for sex difference as a risk factor for sustaining a graft rupture

Return to sports - a risky business? A systematic review with meta-analysis of risk factors for graft rupture following ACL reconstruction, Sports Medicine, Anna Cronström; anna.cronstrom@umu.se, Eva Tengman, Charlotte Häger, Umeå University

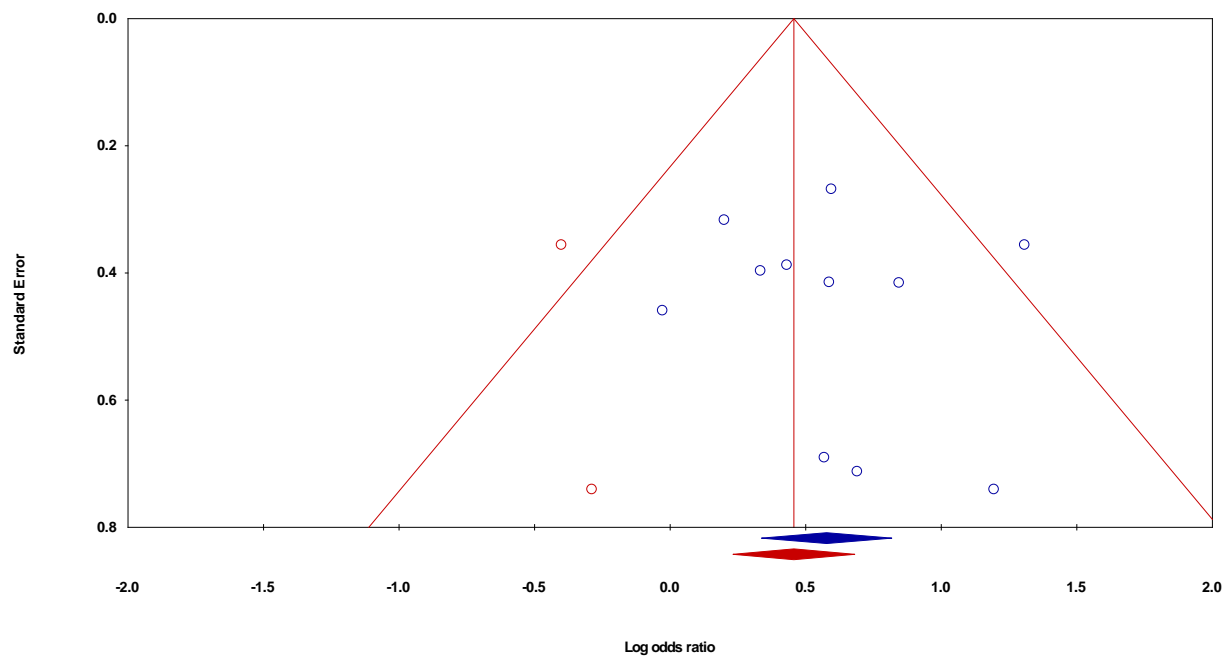

**Fig 2.** Funnel plot with trim and fill imputations for family history as a risk factor for sustaining a graft rupture

Return to sports - a risky business? A systematic review with meta-analysis of risk factors for graft rupture following ACL reconstruction, Sports Medicine, Anna Cronström; anna.cronstrom@umu.se, Eva Tengman, Charlotte Häger, Umeå University

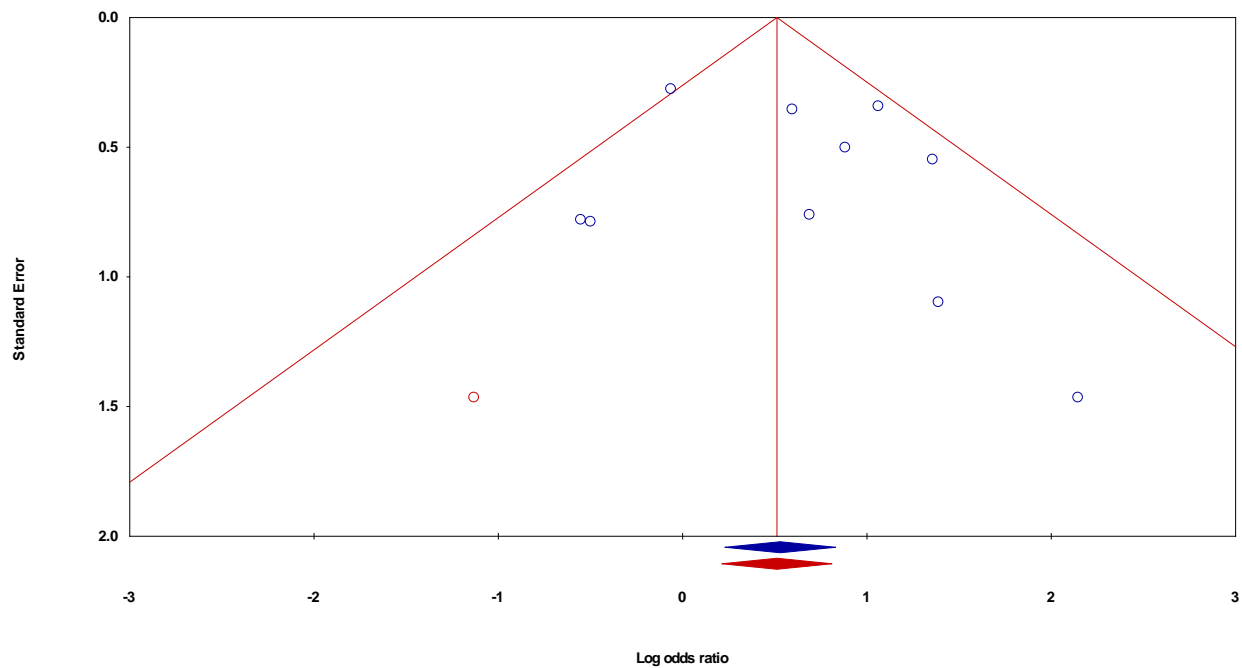

**Fig 3.** Funnel plot with trim and fill imputations for return to a high activity level as a risk factor for sustaining a graft rupture

Return to sports - a risky business? A systematic review with meta-analysis of risk factors for graft rupture following ACL reconstruction, Sports Medicine, Anna Cronström; anna.cronstrom@umu.se, Eva Tengman, Charlotte Häger, Umeå University

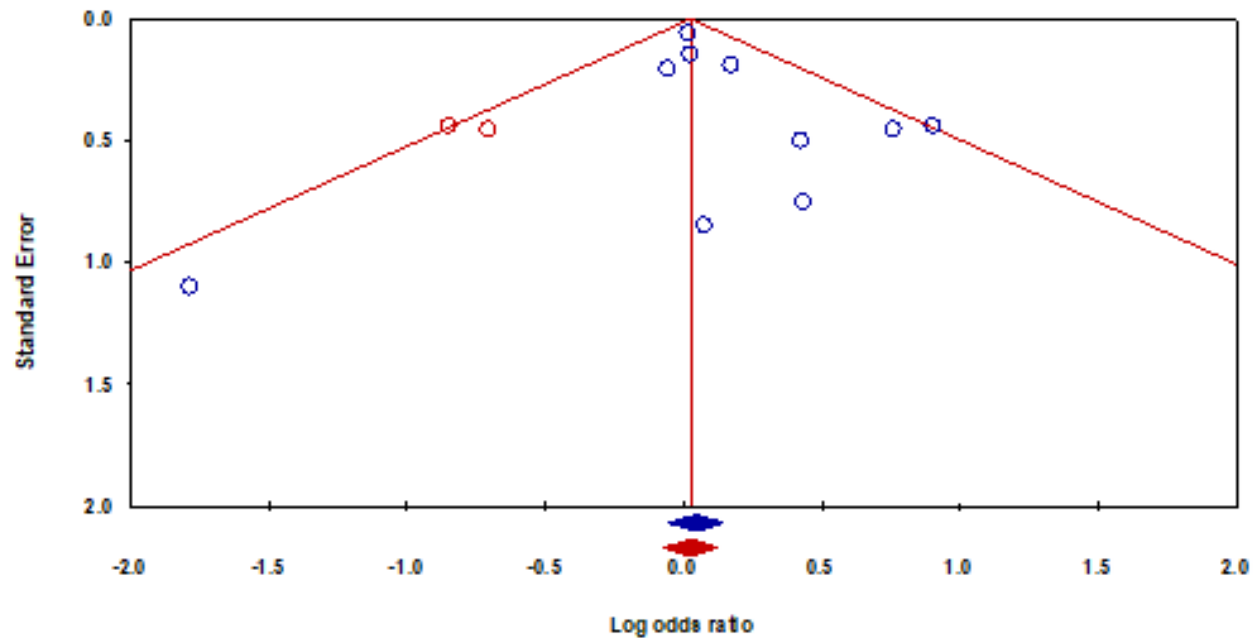

**Fig 4.** Funnel plot with trim and fill imputations for concomitant meniscal tear as a risk factor for sustaining a graft rupture
