# Supplementary material for: Return to Sports: A Risky Business? A Systematic Review with Meta-Analysis of Risk Factors for Graft Rupture Following ACL Reconstruction
Source: PubMed Central journal article supplement (PMC9807539; doi:10.1007/s40279-022-01747-3), 2022-08-24
Supplement: 40279_2022_1747_MOESM7_ESM.pdf [file 40279_2022_1747_MOESM7_ESM.pdf]

**Table 1.** Sensitivity analysis of meta-analytic findings with the exclusion of studies with high risk of bias

| Risk factor                                              | All studies |                    | High risk of bias studies excluded |                    | Findings with exclusion of studies                     |
|----------------------------------------------------------|-------------|--------------------|------------------------------------|--------------------|--------------------------------------------------------|
|                                                          | Studies (n) | OR (95% CI)        | Studies (n)                        | OR (95% CI)        |                                                        |
| Age ≥ 18 vs. < 18                                        | 7           | 3.03 (1.74 – 5.27) | 4                                  | 2.15 (1.43 – 3.24) | No changes                                             |
| Age ≥ 20 vs. < 20                                        | 5           | 3.53 (2.29 – 5.45) | 4                                  | 3.21 (2.14 – 4.82) | No changes                                             |
| Age ≥ 25 vs. < 25                                        | 5           | 2.86 (1.97 – 4.16) | 2                                  | 2.76 (1.54 – 4.94) | No changes                                             |
| Age ≥ 30 vs. < 30                                        | 3           | 2.59 (1.51 – 4.44) | 2                                  | 3.32 (1.57 – 7.01) | No changes                                             |
| Age continuous                                           | 26          | 0.47 (0.38 – 0.59) | 21                                 | 0.46 (0.36 – 0.59) | No changes                                             |
| Sex                                                      | 73          | 0.88 (0.79 – 0.98) | 52                                 | 0.87 (0.77 – 0.99) | No changes                                             |
| Marx score at primary injury                             | 2           | 1.65 (0.53 – 5.16) | No studies removed                 | NA                 | No changes                                             |
| Tegner score at primary injury (continuous)              | 8           | 2.29 (1.48 – 3.55) | No studies removed                 | NA                 | No changes                                             |
| Tegner score at primary injury ≥7 vs. < 7                | 3           | 3.91 (1.69 – 9.01) | No studies removed                 | NA                 | No changes                                             |
| Lateral tibial slope                                     | 8           | 2.21 (1.26 – 3.86) | 7                                  | 2.27 (1.20 – 4.28) | No changes                                             |
| Medial tibial slope                                      | 8           | 1.31 (0.76 – 2.24) | 6                                  | 1.11 (0.47 – 2.61) | No changes                                             |
| Femoral condyle ratio                                    | 2           | 1.19 (0.65 – 2.19) | No studies removed                 | NA                 | No changes                                             |
| Duration between injury and surgery ≥ 12 vs. < 12 months | 2           | 1.87 (1.58 – 2.22) | No studies removed                 | NA                 | No changes                                             |
| Duration between injury and surgery ≥ 6 vs. < 6 months   | 2           | 1.57 (0.58 – 3.74) | NA                                 | NA                 | Insufficient studies retained to perform meta-analyses |
| Duration between injury and surgery ≥ 3 vs. < 3 months   | 2           | 1.40 (0.29 – 6.79) | No studies removed                 | NA                 | No changes                                             |
| Return to pre-injury activity level                      | 11          | 1.87 (1.21 – 2.91) | 8                                  | 1.85 (1.12 – 3.07) | No changes                                             |
| Family history of ACL injury                             | 11          | 1.76 (1.34 – 2.31) | 7                                  | 1.99 (1.50 – 2.65) | No changes                                             |

Return to sports - a risky business? A systematic review with meta-analysis of risk factors for graft rupture following ACL reconstruction, Sports Medicine, Anna Cronström; anna.cronstrom@umu.se, Eva Tengman, Charlotte Häger, Umeå University

|                                                    |    |                      |                    |                    |                                                        |
|----------------------------------------------------|----|----------------------|--------------------|--------------------|--------------------------------------------------------|
| KOOS ADL                                           | 2  | 0.89 (0.39 – 2.02)   | No studies removed | NA                 | No changes                                             |
| KOOS pain                                          | 2  | 0.95 (0.80 – 1.12)   | No studies removed | NA                 | No changes                                             |
| KOOS QoL                                           | 2  | 1.01 (0.85 – 0.19)   | No studies removed | NA                 | No changes                                             |
| KOOS sport/recreation                              | 2  | 0.96 (0.81 – 1.13)   | No studies removed | NA                 | No changes                                             |
| KOOS symptom                                       | 2  | 0.81 (0.69 – 0.95)   | No studies removed | NA                 | No changes                                             |
| Psychological readiness to RTS                     | 2  | 2.18 (1.32 – 2.61)   | NA                 | NA                 | Insufficient studies retained to perform meta-analyses |
| Concomitant cartilage injury                       | 9  | 0.70 (0.62 – 0.79)   | No studies removed | NA                 | No changes                                             |
| Concomitant meniscal tear                          | 10 | 1.07 (0.94 – 1.22)   | No studies removed | NA                 | No changes                                             |
| Concomitant meniscal repair                        | 4  | 1.00 (0.60 – 1.66)   | No studies removed | NA                 | No changes                                             |
| Concomitant Meniscectomy                           | 9  | 1.16 (0.93 – 1.46)   | 8                  | 1.16 (0.92 – 1.46) | No changes                                             |
| Concomitant MCL injury                             | 2  | 0.99 – (0.70 – 1.41) | No studies removed | NA                 | No changes                                             |
| BMI ≥ 25 vs. < 25                                  | 3  | 1.22 (0.48 – 3.11)   | 2                  | 0.70 (0.56 – 0.89) | BMI ≥ 25 associated with lower odds of graft rupture   |
| BMI (continuous)                                   | 12 | 0.87 (0.73 – 1.03)   | 11                 | 0.85 (0.69 – 1.06) | No changes                                             |
| Smoking status                                     | 5  | 0.77 (0.45 – 1.31)   | No studies removed | NA                 | No changes                                             |
| Contact vs non-contact mechanism of primary injury | 4  | 1.70 (0.75 – 3.87)   | 2                  | 2.12 (0.80 – 5.59) | No changes                                             |
| General joint laxity                               | 2  | 3.20 (0.37 – 27.93)  | NA                 | NA                 | Insufficient studies retained to perform meta-analyses |
| Growth-plate status                                | 2  | 1.04 (0.44 – 2.48)   | No studies removed | NA                 | No changes                                             |

Return to sports - a risky business? A systematic review with meta-analysis of risk factors for graft rupture following ACL reconstruction, Sports Medicine, Anna Cronström; anna.cronstrom@umu.se, Eva Tengman, Charlotte Häger, Umeå University

|                                        |   |                    |                    |                    |                                                        |
|----------------------------------------|---|--------------------|--------------------|--------------------|--------------------------------------------------------|
| Number of physical therapy visits      | 2 | 1.19 (0.40 – 3.48) | No studies removed | NA                 | No changes                                             |
| Timing of RTS ≥ 6 vs. <6 months        | 2 | 1.12 (0.68 – 1.83) | NA                 | NA                 | Insufficient studies retained to perform meta-analyses |
| Type of sport (soccer vs other sports) | 5 | 1.32 (0.82 – 2.15) | No studies removed | NA                 | No changes                                             |
| Hop performance (SLHD)                 | 4 | 0.99 (0.65 – 1.50) | 2                  | 1.10 (0.38 – 3.18) | No changes                                             |
| Hop performance (THD)                  | 2 | 1.15 (0.74 – 1.81) | NA                 | NA                 | Insufficient studies retained to perform meta-analyses |
| Knee abduction                         | 2 | 0.53 (0.15 – 1.91) | No studies removed | NA                 | No changes                                             |
| Q-ceps peak torque                     | 2 | 1.06 (0.61 – 1.83) | NA                 | NA                 | Insufficient studies retained to perform meta-analyses |
| Hamstring peak torque                  | 2 | 0.59 (0.34 – 1.02) | NA                 | NA                 | Insufficient studies retained to perform meta-analyses |

OR = odds ratio, ACL = anterior cruciate ligament, KOOS = Knee injury and Osteoarthritis Outcome Score, ADL = activities of Daily Living, QoL = Quality of Life, RTS = return to sport, MCL = medial collateral ligament, BMI = body mass index, SLHD = single-leg hop for distance, THD = triple hop for distance, NA = not applicable
